# Supplementary material for: Health and wellness coaching positively impacts individuals with chronic pain and pain-related interference
Source: PLoS One. 2020 Jul 27;15(7):e0236734. doi: 10.1371/journal.pone.0236734 (PMC7384647; doi:10.1371/journal.pone.0236734)
Supplement: S2 File — (XLSX) [file pone.0236734.s003.xlsx]

## Sheet: tbl_poq_intake
pain_locations	pain_locations_other	pain_location_interferes_most	average_pain_last_week	acceptable_average_pain_level	length_of_pain	health_visits_last_3_months	other_physical_illnesses	other_illnesses	interfere_ability_walk	interfere_everyday_objects	interfere_with_stairs	pain_require_cane_walker	interfere_with_bathing	interfere_with_dressing	interfere_with_bathroom	interfere_with_grooming	affect_self_esteem_self_worth	rate_physical_activity	rate_overall_energy	rate_strength_endurance_today	rate_depresson_today	rate_anxiety_today	worry_about_re_injury	how_safe_to_exercise	problems_concentrating_today	how_often_feeling_tense	mobility_total	adl_total	vitality_total	na_total	fear_total	pain_total	total_score
'Abdomen','Arm/hand','Buttocks','Fingers','foot','Leg','Low back','Mid-back','Neck','Shoulder','Toes'		Low back	8	8	156	42	'Diabetes','Other'		10	10	10	10	10	10	10	5	5	3	1	2	5	5	0	5	5	5	40	35	24	25	5	8	137
'Abdomen'		Abdomen	6	3	24	15	'Liver disease','Other'		5	5	5	0	0	0	0	0	6	6	4	4	3	0	6	6	0	3	15	0	16	12	12	6	61
'Arm/hand','Face','Fingers','foot','Genitals','Head','Leg','Low back','Neck','Other','Shoulder','Toes','Upper back'		Head	6	2	144	20	'Diabetes','Other'		7	7	6	0	3	3	4	3	7	3	3	4	2	4	4	5	9	6	20	13	20	28	9	6	96
'Arm/hand','Face','Fingers','Head','Low back','Mid-back','Neck','Shoulder','Upper back'		Neck	7	3	228	9	'None'		4	8	2	0	4	3	1	7	8	0	3	1	7	5	7	2	1	3	14	15	26	24	9	7	95
'Abdomen','Arm/hand','Buttocks','Fingers','foot','Head','Leg','Low back','Mid-back','Neck','Shoulder','Toes','Upper back'		Head	7	3	32	17	'Seizures'		6	4	5	0	0	3	5	0	10	2	2	0	8	8	10	3	10	9	15	8	26	45	13	7	114
'Head','Jaw','Low back','Mid-back','Neck','Shoulder','Upper back'		Shoulder	7	4	168	0	'Cancer','Thyroid disease'		7	7	7	0	10	8	4	8	9	4	1	1	10	7	9	6	9	4	21	30	24	39	15	7	136
'Buttocks','Low back','Mid-back'		Low back	6	6	90	7	'High blood pressure'		8	8	7	2	0	3	0	0	0	2	2	2	7	8	1	8	9	8	25	3	24	32	9	6	99
'Low back'		Low back	6	4	372	1	'High blood pressure'		3	8	9	3	0	2	0	0	10	4	4	5	5	2	5	8	9	3	23	2	17	29	13	6	90
'Abdomen','Chest','Head','Low back','Mid-back','Neck','Other','Shoulder'		Neck	10	6	240	28	'High blood pressure','Other'		10	10	3	0	10	7	8	3	10	0	0	0	10	7	0	5	10	10	23	28	30	47	5	10	143
'Low back','Mid-back','Neck','Other','Shoulder'		Upper back	6	4	84	10	'High blood pressure','Thyroid disease'		9	7	5	9	0	4	0	0	10	1	3	3	7	3	7	5	6	4	30	4	23	30	12	6	105
'Buttocks','foot','Leg','Low back','Toes'		Leg	5	3	30	15	'None'		9	3	8	3	1	1	1	2	10	2	3	3	5	3	10	5	2	7	23	5	22	27	15	5	97
'Arm/hand','foot','Leg','Low back'		Arm/Hand	5	2	120	12	'High blood pressure','Other'		5	10	5	5	6	10	5	5	10	2	6	4	9	10	0	9	5	9	25	26	18	43	9	5	126
'Arm/hand','Buttocks','foot','Leg','Low back','Mid-back','Neck','Other','Toes','Upper back'		Buttocks	8	4	60	10	'None'		10	10	6	2	5	0	0	0	10	0	3	2	5	8	10	1	6	7	28	5	25	36	11	8	113
'Abdomen','Arm/hand','Chest','Low back','Mid-back','Neck','Shoulder','Upper back'		Upper back	8	5	60	75	'Other','Thyroid disease'		4	10	6	5	10	10	10	5	10	0	3	3	9	5	10	4	10	7	25	35	24	41	14	8	147
'Arm/hand','foot','Head','Other'		Head	4	1	33	6	'Other','Thyroid disease'		3	3	2	0	0	0	0	0	5	3	3	5	7	7	10	5	6	8	8	0	19	33	15	4	79
'Buttocks','foot','Leg','Low back','Mid-back','Toes'		Low back	9	5	120	19			6	9	7	1	4	4	2	1	10	1	2	1	9	6	10	2	6	5	23	11	26	36	12	9	117
'Head','Neck','Other'		Head	4	4	84	8	'Seizures'		2	1	0	10	0	0	0	0	4	1	5	4	3	4	1	1	8	5	13	0	20	24	2	4	63
'Arm/hand','Fingers','foot','Leg','Low back','Mid-back','Neck','Other','Shoulder','Upper back'		Other	7	3	144	3	'None'		5	6	10	0	5	5	10	2	10	4	1	2	8	9	1	8	8	10	21	22	23	45	9	7	127
'Abdomen','Arm/hand','Buttocks','Chest','Face','Fingers','foot','Genitals','Head','Jaw','Leg','Low back','Mid-back','Neck','Shoulder','Upper back'		Low back	8	4	312		'None'		5	7	5	1	1	4	5	1	9	4	3	3	5	8	9	3	6	8	18	11	20	36	12	8	105
'Arm/hand','Fingers','Neck','Shoulder'		Arm/Hand	7	3	6	100	'None'		0	8	0	0	5	5	0	0	8	6	3	5	5	4	9	6	0	5	8	10	16	22	15	7	78
'Arm/hand','Buttocks','Fingers','foot','Head','Jaw','Leg','Low back','Neck','Shoulder','Toes','Upper back'		Neck	7	4	25	1	'None'		6	8	10	7	5	6	9	6	10	2	1	1	9	8	10	4	9	8	31	26	26	44	14	7	148
'Abdomen'		Abdomen	6	0	178	12	'Heart disease','High blood pressure'		4	0	0	0	0	0	0	0	8	6	0	2	8	3	0	10	9	9	4	0	22	37	10	6	79
'Arm/hand','Buttocks','Fingers','Leg','Low back','Mid-back','Neck','Other','Shoulder','Upper back'		Shoulder	6	2	16	3	'High blood pressure','Other'		3	5	3	0	0	0	0	0	4	5	5	3	4	5	10	6	6	6	11	0	17	25	16	6	75
'Arm/hand','Fingers','Neck','Shoulder'		Neck	6	2	50	1			0	5	0	0	0	1	0	0	8	6	4	6	9	7	10	8	6	10	5	1	14	40	18	6	84
'Arm/hand','foot','Leg','Low back','Neck','Shoulder','Toes','Upper back'		Arm/Hand	4	0	20	40	'None'		2	9	7	0	1	1	0	0	2	2	6	8	1	2	9	5	0	1	18	2	14	6	14	4	58
'Arm/hand','Buttocks','Chest','Face','Fingers','foot','Head','Jaw','Leg','Low back','Mid-back','Neck','Shoulder','Toes','Upper back'		Face	9	4	42	6	'High blood pressure'		6	9	6	0	3	0	4	4	5	5	5	4	5	8	2	9	6	7	21	11	16	31	11	9	99
'Arm/hand','Buttocks','Chest','Fingers','foot','Leg','Low back'		Leg	8	5	92	30	'None'		10	7	10	9	0	3	0	0	8	5	5	5	7	8	3	9	7	7	36	3	15	37	12	8	111
'Arm/hand','Buttocks','Fingers','foot','Leg','Low back','Mid-back','Neck','Other','Shoulder'		Leg	7	2	120	3	'High blood pressure','Other'		10	8	9	8	4	5	3	0	10	2	4	0	10	9	5	4	8	8	35	12	24	45	9	7	132
'Arm/hand','Leg','Neck','Shoulder','Upper back'		Shoulder	6	5	48	15	'None'		1	10	1	0	1	2	1	0	2	3	3	3	1	1	0	10	8	1	12	4	21	13	10	6	66
'foot','Head','Leg','Low back','Mid-back','Other','Shoulder','Upper back'		Leg	4	2	45	22	'Other'		7	3	6	8	1	1	0	1	8	1	1	3	8	0	9	5	8	4	24	3	25	28	14	4	98
'Abdomen','Chest','Low back'		Abdomen	8	4	120	50	'None'		5	8	8	0	2	1	0	7	10	1	3	1	7	5	3	5	0	8	21	10	25	30	8	8	102
'Abdomen','Buttocks','Genitals','Leg'		Genitals	7	1	8	6	'High blood pressure','Other'		10	6	10	0	0	5	0	0	10	2	6	7	7	7	10	6	8	10	26	5	15	42	16	7	111
'Low back','Mid-back','Neck','Upper back'		Mid-back	8	6	16	12	'High blood pressure','Other'		7	10	10	10	6	0	0	0	5	0	5	5	7	2	10	2	5	2	37	6	20	21	12	8	104
'Arm/hand','Fingers','Head','Jaw','Low back','Mid-back','Neck','Shoulder','Upper back'		Neck	8	5	9	3	'Other'		6	6	0	0	0	3	3	0	8	5	5	4	6	6	4	8	8	8	12	6	16	36	12	8	90
'Abdomen','Arm/hand','Buttocks','Chest','Face','Fingers','foot','Head','Jaw','Leg','Low back','Mid-back','Neck','Other','Shoulder','Toes','Upper back'		Buttocks	6	4	120	2	'High blood pressure','Other','Thyroid disease'		6	3	4	0	2	0	0	4	6	6	5	7	6	6	5	6	7	6	13	6	12	31	11	6	79
'Abdomen','Arm/hand','Buttocks','Chest','Face','Fingers','foot','Head','Jaw','Leg','Low back','Mid-back','Neck','Other','Shoulder','Toes','Upper back'		Shoulder	7	4	14	6	'Liver disease','Lung Disease'		2	5	6	1	0	0	0	0	3	6	3	8	3	7	2	7	5	10	14	0	13	28	9	7	71
'Buttocks','Mid-back'		Buttocks	10	4	84	1	'None'		10	9	10	1	9	9	9	8	10	2	2	1	8	10	10	1	6	10	30	35	25	44	11	10	155
'Buttocks','foot','Leg','Low back','Mid-back','Neck','Other'		Low back	7	4	300	5	'None'		2	3	1	1	2	3	3	3	2	4	0	0	7	5	0	5	8	2	7	11	26	24	5	7	80
'foot','Leg','Low back','Mid-back','Neck','Other'		Low back	6	3	16	30	'Other'		4	4	4	0	0	0	0	0	3	5	6	3	5	2	5	10	4	4	12	0	16	18	15	6	67
'Head'		Head	7	3	51	4			7	7	7	0	3	5	0	1	0	0	2	2	0	5	10	3	10	0	21	9	26	15	13	7	91
'Abdomen','Arm/hand','Face','Fingers','foot','Head','Jaw','Leg','Neck','Shoulder','Toes'		Neck	6	4	7	11			5	6	7	0	4	7	0	4	6	6	5	7	4	5	0	10	8	4	18	15	12	27	10	6	88
'Abdomen','Arm/hand','Buttocks','Chest','Fingers','foot','Head','Leg','Low back','Mid-back','Neck','Shoulder','Toes','Upper back'		Low back	8	5	240	7	'Diabetes','Heart disease','High blood pressure','Liver disease','Thyroid disease'		10	10	10	10	0	3	0	5	7	1	2	0	6	3	2	0	10	7	40	8	27	33	2	8	118
'Buttocks','Leg','Low back','Neck','Shoulder'		Leg	9	0	69	2	'None'		10	4	7	9	9	5	5	5	5	1	2	2	5	5	3	9	5	8	30	24	25	28	12	9	128
'Arm/hand','Buttocks','Leg','Low back'		Low back	8	5	180	5	'High blood pressure'		7	8	7	1	8	6	4	0	5	2	3	5	1	1	6	1	8	7	23	18	20	22	7	8	98
'Abdomen','Arm/hand','Chest','Face','Fingers','Jaw','Mid-back','Neck','Shoulder','Upper back'		Mid-back	8	4	68	6	'None'		10	10	6	0	5	4	0	5	10	2	0	0	10	8	10	5	7	10	26	14	28	45	15	8	136
'Face','Head'		Head	7	3	18	20	'High blood pressure'		8	0	4	0	0	5	0	0	0	0	2	1	0	0	8	5	10	7	12	5	27	17	13	7	81
'Fingers','foot','Head','Leg','Low back','Neck'		Low back	5	4	192	4	'High blood pressure'		5	0	5	0	0	0	0	0	5	3	3	5	6	0	2	5	0	5	10	0	19	16	7	5	57
'foot','Low back','Neck'		Neck	4	8	72	4	'Other'		0	5	1	0	0	3	0	3	5	4	4	4	0	0	0	10	8	4	6	6	18	17	10	4	61
'Low back','Mid-back'		Low back	3	1	60	5	'Other'		6	7	5	0	2	1	0	1	8	2	2	3	3	3	10	4	2	9	18	4	23	25	14	3	87
'Face','Head','Jaw','Low back','Neck'		Face	7	4	24	20	'Other'		0	0	0	0	0	0	0	6	6	1	3	3	9	8	9	2	10	8	0	6	23	41	11	7	88
'Abdomen','Mid-back'		Mid-back	8	3	48	3	'High blood pressure'		5	6	6	0	7	3	3	6	9	4	3	2	6	9	1	9	8	7	17	19	21	39	10	8	114
'Abdomen','Arm/hand','Buttocks','Chest','Face','Fingers','foot','Genitals','Leg','Low back','Mid-back','Neck','Shoulder','Toes'		Low back	7	3	204	20	'Diabetes','High blood pressure'		10	9	10	10	7	5	9	6	10	2	2	2	5	7	10	9	9	8	39	27	24	39	19	7	155
'Arm/hand','Fingers','foot','Leg','Low back','Mid-back','Neck','Shoulder','Toes'		Arm/Hand	8	3	27	25	'High blood pressure'		10	10	10	2	8	8	5	5	10	2	3	3	9	9	10	3	10	10	32	26	22	48	13	8	149
'Buttocks','Fingers','foot','Leg','Low back','Mid-back','Toes','Upper back'		Low back	4	2	96	1	'Thyroid disease'		3	3	3	0	0	0	0	3	5	3	3	2	2	0	8	3	0	6	9	3	22	13	11	4	62
'Buttocks','Leg','Low back','Mid-back','Neck','Shoulder'		Low back	5	1	42	7	'High blood pressure'		10	10	10	0	7	8	2	10	10	2	4	3	1	0	1	8	4	2	30	27	21	17	9	5	109
'Buttocks','foot','Jaw','Leg','Low back','Mid-back','Toes'		Low back	7	3	72	7	'Thyroid disease'		8	7	9	7	3	3	4	5	10	3	4	7	4	6	5	5	5	5	31	15	16	30	10	7	109
'Arm/hand','Fingers','foot','Head','Neck','Shoulder','Upper back'		Arm/Hand	6	0	71	20	'Other'		2	10	0	0	0	4	0	3	2	0	1	2	1	0	4	10	2	5	12	7	27	10	14	6	76
'Arm/hand','Fingers','Neck','Shoulder','Upper back'		Upper back, Shoulder	4		24	6	'Other'		1	1	0	0	1	1	0	3	5	3	2	1	2	0	0	0	0	9	2	5	24	16	0	4	51
'Arm/hand','Fingers','Shoulder'		Arm/Hand	9	2	30	9	'None'		2	10	2	0	5	10	5	5	5	0	0	0	5	5	5	0	5	5	14	25	30	25	5	9	108
'Arm/hand','Head','Neck','Shoulder','Upper back'		Neck	6	3	18	44	'High blood pressure','Other'		0	8	3	0	0	2	0	2	8	2	5	1	5	5	9	5	5	5	11	4	22	28	14	6	85
'Arm/hand','Buttocks','foot','Leg','Low back','Mid-back','Neck','Toes','Upper back'		Low back	5	3	33	12	'Diabetes'		4	6	5	0	1	1	0	0	8	3	3	3	5	4	9	5	7	5	15	2	21	29	14	5	86
'Head','Low back','Shoulder','Upper back'		Shoulder	8	2	24	0	'None'		0	7	0	0	0	0	0	0	9	3	1	3	7	6	7	4	7	10	7	0	23	39	11	8	88
'Arm/hand','Buttocks','Chest','Fingers','Head','Leg','Low back','Mid-back','Neck','Shoulder','Upper back'		Upper back, Neck	2	5	42	7	'Heart disease'		3	5	5	0	2	2	0	0	5	7	3	4	7	6	8	6	6	8	13	4	16	32	14	2	81
'Abdomen','Arm/hand','Buttocks','Chest','Face','Fingers','foot','Head','Jaw','Leg','Low back','Neck','Shoulder'		Neck, Shoulder	7	5	60	0	'Lung Disease','Seizures'		4	8	5	0	5	3	3	3	2	0	2	2	6	3	10	0	5	10	17	14	26	26	10	7	100
'Arm/hand','Leg','Low back','Mid-back','Neck','Shoulder','Upper back'		Shoulder	6	3	24	0	'None'		0	7	6	0	3	3	0	2	3	6	5	6	2	4	7	6	0	6	13	8	13	15	13	6	68
'Arm/hand','Buttocks','Face','Fingers','Genitals','Leg','Low back'		Low back	9	7	228	3	'High blood pressure','Other'		10	8	8	10	8	6	7	1	9	0	0	1	8	8	5	1	10	8	36	22	29	43	6	9	145
'Buttocks','Chest','foot','Genitals','Leg','Low back','Mid-back','Neck','Shoulder'		Buttocks	6	4	44	25			7	6	6	4	3	1	9	0	8	3	5	5	5	7	8	7	5	9	23	13	17	34	15	6	108
'Arm/hand','Chest','Fingers','Head','Jaw','Low back','Neck','Other','Shoulder','Upper back'		Arm/Hand	5	3	134	1	'None'		1	5	1	0	0	3	0	1	9	7	7	7	0	0	3	8	6	3	7	4	9	18	11	5	54
'Buttocks','Leg','Low back','Other'		Other	5	1	17	12	'High blood pressure','Kidney disease'		2	7	8	0	2	5	10	9	6	1	2	3	4	5	5	7	4	6	17	26	24	25	12	5	109
'Arm/hand','Buttocks','Face','foot','Jaw','Leg','Low back','Mid-back','Neck','Other','Shoulder','Upper back'		Other	6	3	60	0	'Cancer'		5	0	6	4	0	0	1	0	4	5	7	7	0	4	10	8	4	4	15	1	11	16	18	6	67
'Arm/hand','Face','Fingers','Head','Jaw','Neck','Shoulder','Upper back'		Jaw	2	3	72	1	'Other'		1	2	1	0	0	0	0	0	5	8	7	7	2	1	7	7	2	4	4	0	8	14	14	2	42
'Buttocks','Chest','Fingers','foot','Head','Leg','Low back','Mid-back','Neck','Other','Shoulder','Upper back'		Upper back	6	2	312	7	'High blood pressure','Other'		6	8	10	0	0	2	0	6	10	5	4	2	2	2	8	8	5	9	24	8	19	28	16	6	101
'Arm/hand','Chest','Face','Fingers','foot','Head','Jaw','Leg','Low back','Mid-back','Neck','Shoulder','Toes','Upper back'		Mid-back	7	0	132	3	'High blood pressure','Thyroid disease'		5	8	5	0	0	0	0	0	0	5	3	3	6	5	2	5	8	6	18	0	19	25	7	7	76
'Arm/hand','Fingers','foot','Head','Low back','Mid-back','Neck','Other','Shoulder','Upper back'		Upper back	8	3	48	18	'None'		0	5	2	0	0	0	0	0	6	5	5	3	3	5	10	6	6	9	7	0	17	29	16	8	77
'Abdomen','Arm/hand','Buttocks','Face','Fingers','foot','Head','Jaw','Leg','Low back','Mid-back','Neck','Shoulder','Toes','Upper back'		Head, Neck	8	5	540	22	'Other','Thyroid disease'		2	10	6	0	4	5	0	3	8	5	4	4	5	7	7	7	8	9	18	12	17	37	14	8	106
'Arm/hand','Fingers','foot','Leg','Low back','Neck','Other','Shoulder','Toes'		Other	5	3	36	10	'High blood pressure','Other'		8	5	5	0	0	0	4	5	5	4	4	5	0	3	5	5	8	5	18	9	17	21	10	5	80
'Arm/hand','Buttocks','Fingers','foot','Head','Jaw','Leg','Low back','Mid-back','Neck','Shoulder','Upper back'		Low back	8	0	362	3	'Heart disease'		10	10	10	10	10	8	8	0	0	0	0	0	2	0	9	0	0	1	40	26	30	3	9	8	116
'Arm/hand','foot','Leg','Low back','Neck','Shoulder'		Neck	6	4	168	2	'Other'		5	5	6	0	0	0	0	0	3	5	5	5	3	3	3	5	7	5	16	0	15	21	8	6	66
			6						2	4	0	0	0	0	0	0	0	1	4	4	4	4	8	7	7	8	6	0	21	23	15	6	71
'Abdomen','Arm/hand','Buttocks','Leg','Low back','Mid-back','Neck','Other','Upper back'		Low back	7	3	24	14			6	2	2	0	3	0	4	1	8	3	4	2	7	3	10	5	6	8	10	8	21	32	15	7	93
'Leg'		Leg	8	5	78	21	'Other'		10	10	10	0	1	3	1	0	10	1	0	0	10	0	2	7	10	0	30	5	29	30	9	8	111
'Arm/hand','Buttocks','Face','Fingers','foot','Head','Leg','Low back','Mid-back','Neck','Shoulder','Toes','Upper back'		Leg	7	3	78	4	'Diabetes','High blood pressure'		5	10	7	4	6	7	7	8	10	2	3	5	5	5	5	6	7	5	26	28	20	32	11	7	124
'Abdomen','Arm/hand','Buttocks','foot','Head','Jaw','Leg','Low back','Mid-back','Neck','Shoulder','Upper back'		Low back	7	7	36	10			5	4	4	0	0	0	0	0	7	5	4	5	6	6	8	9	5	10	13	0	16	34	17	7	87
'Abdomen','Arm/hand','Chest','Fingers','foot','Leg','Low back','Mid-back','Neck','Other','Shoulder','Upper back'		Low back	8	3	84	27	'Cancer','High blood pressure','Other'		8	7	10	4	0	7	2	0	9	3	2	4	6	6	8	3	5	9	29	9	21	35	11	8	113
'Abdomen','Buttocks','foot','Genitals','Leg','Low back','Neck','Shoulder','Toes'		Low back	5	2	33	16	'None'		1	6	2	0	3	1	5	0	8	2	0	2	8	5	10	0	5	5	9	9	26	31	10	5	90
'Arm/hand','Chest','Low back','Mid-back','Neck','Other','Shoulder','Upper back'		Upper back	7	0	84	0	'None'		2	4	0	1	3	1	0	0	0	7	5	5	2	0	4	10	2	9	7	4	13	13	14	7	58
'Arm/hand','Fingers','Low back'		Arm/Hand	8	4	39	3	'High blood pressure'		2	10	2	0	6	5	0	3	10	10	0	2	4	8	10	4	10	8	14	14	18	40	14	8	108
'Arm/hand','Buttocks','Chest','Face','Fingers','Head','Jaw','Leg','Low back','Mid-back','Neck','Shoulder','Upper back'		Low back	7	3	18	3	'High blood pressure','Thyroid disease'		8	2	3	0	0	0	0	0	3	4	5	6	4	2	2	10	6	6	13	0	15	21	12	7	68
'Buttocks','foot','Genitals','Leg','Low back','Toes'		Low back	7	4	159	20	'None'		2	4	0	0	1	0	5	0	4	5	5	7	2	3	5	7	2	5	6	6	13	16	12	7	60
'Buttocks','foot','Genitals','Low back','Toes'		Low back	8	5	74	3	'None'		10	10	10	3	10	10	10	10	5	1	7	6	0	0	5	0	5	10	33	40	16	20	5	8	122
'Buttocks','Chest','Fingers','foot','Head','Low back','Mid-back','Neck','Shoulder','Upper back'		Low back	7	3	48	10	'None'		1	1	4	0	3	5	0	0	7	4	1	3	2	1	2	10	4	8	6	8	22	22	12	7	77
'Genitals','Leg','Low back','Other'		Low back	7	2	10	15	'Other'		8	7	4	0	0	0	0	0	7	5	5	6	3	0	2	9	2	6	19	0	14	18	11	7	69
'Neck','Other','Shoulder'		Neck	8	2	11	8	'High blood pressure'		0	4	0	0	0	0	0	2	5	2	1	1	0	1	7	8	0	5	4	2	26	11	15	8	66
'Abdomen','Arm/hand','Fingers','Genitals','Head','Jaw','Leg','Low back','Neck','Shoulder','Upper back'		Neck	8	4	168	168	'None'		10	10	10	2	5	5	5	8	10	0	2	0	8	10	5	2	5	8	32	23	28	41	7	8	139
'Leg','Low back','Mid-back'		Low back	4	4	144	30	'High blood pressure','Other','Thyroid disease'		1	7	7	0	4	3	0	0	10	8	5	3	7	10	10	7	5	5	15	7	14	37	17	4	94
'Abdomen','Arm/hand','Buttocks','Chest','Face','Fingers','foot','Head','Jaw','Leg','Low back','Mid-back','Neck','Shoulder','Toes','Upper back'		Low back	8	3	48	8	'Diabetes','High blood pressure','Lung Disease'		5	5	5	2	2	0	0	3	7	0	4	4	3	4	8	5	8	7	17	5	22	29	13	8	94
'Low back','Neck','Shoulder'		Low back	2	1	24	35	'High blood pressure','Lung Disease'		4	3	10	0	0	0	2	0	0	5	5	5	3	4	0	7	10	3	17	2	15	20	7	2	63
'Buttocks','foot','Genitals','Leg','Low back','Mid-back','Toes'		Low back	9	5	164	2	'High blood pressure','Other'		10	8	10	10	10	10	10	8	10	0	0	0	9	8	2	0	10	8	38	38	30	45	2	9	162
'Abdomen','Buttocks','foot','Leg','Low back','Toes'		Low back	8	4	60	9	'Diabetes','Heart disease','High blood pressure','Other','Thyroid disease'		10	6	10	10	8	6	4	6	9	1	4	0	8	8	10	3	5	8	36	24	25	38	13	8	144
'foot','Leg','Toes'		Foot	5	5	72	80	'High blood pressure'		5	5	5	5	5	5	5	5	3	5	7	5	0	0	10	7	5	3	20	20	13	11	17	5	86
'Arm/hand','Buttocks','Chest','Face','Fingers','foot','Genitals','Head','Leg','Low back','Neck','Shoulder','Toes','Upper back'		Leg, Head	6	4	24	10	'None'		5	3	6	3	2	1	0	0	0	0	5	0	0	0	3	3	10	2	17	3	25	12	6	6	69
'Arm/hand','Buttocks','foot','Leg','Low back','Mid-back'		Leg	6	3	18	3	'High blood pressure'		9	10	10	9	8	5	10	3	8	1	2	3	3	5	4	6	2	9	38	26	24	27	10	6	131
'Arm/hand','Leg','Low back','Shoulder'		Other	5	3	42	0	'Other'		5	4	4	0	0	2	0	0	4	7	6	6	4	2	5	7	2	6	13	2	11	18	12	5	61
'Arm/hand','Face','Fingers','Low back','Neck','Shoulder'		Low back	6	3	132	0	'High blood pressure','Seizures'		7	6	3	0	5	4	3	0	8	4	5	2	4	2	5	5	7	9	16	12	19	30	10	6	93
'Head','Jaw','Neck','Shoulder'		Head	10	4	240	10	'Other','Thyroid disease'		9	6	9	0	6	6	0	0	0	0	3	4	10	5	8	2	8	9	24	12	23	32	10	10	111
'Abdomen','foot','Head','Jaw','Leg','Low back','Mid-back','Neck','Toes','Upper back'		Leg	6	1	116	56	'High blood pressure'		7	6	10	4	0	3	5	0	10	2	3	3	1	1	10	0	5	8	27	8	22	25	10	6	98
'Arm/hand','Head','Neck','Shoulder'		Head	8	4	204	5	'Thyroid disease'		0	5	0	0	0	2	0	2	5	5	5	3	7	7	10	8	6	9	5	4	17	34	18	8	86
'Buttocks','foot','Leg','Low back','Mid-back'		Low back	6	3	14	8	'Lung Disease'		8	8	8	0	0	2	0	0	3	4	5	5	1	1	7	2	0	3	24	2	16	8	9	6	65
'Arm/hand','Buttocks','Fingers','foot','Head','Leg','Low back','Shoulder','Toes'		Low back	7		180	8	'Other'		10	8	10	2	10	7	5	2	8	4	2	0	1	0	8	10	3	9	30	24	24	21	18	7	124
'Shoulder'		Shoulder	6	3	42	2	'None'		7	8	3	0	3	3	0	1	9	3	1	2	8	10	8	5	7	9	18	7	24	43	13	6	111
'Buttocks','Leg','Low back','Mid-back','Shoulder','Upper back'		Low back	7	4	36	12	'Diabetes','High blood pressure'		7	7	4	0	5	2	0	4	8	2	2	2	9	9	8	3	8	8	18	11	24	42	11	7	113
'Arm/hand','Fingers','foot','Leg','Low back','Mid-back','Neck','Other','Shoulder','Upper back'		Shoulder, Arm/Hand, Other	7	3	1	5			7	6	2	0	0	0	0	2	5	5	3	4	5	3	2	9	7	10	15	2	18	30	11	7	83
'Arm/hand','Fingers','Head','Low back','Mid-back','Neck','Shoulder','Upper back'		Neck	6	4	36	14	'Other','Thyroid disease'		4	5	3	0	0	0	0	0	4	6	4	3	6	4	5	4	5	7	12	0	17	26	9	6	70
'Face','Head'		Face	5	0	16	1	'None'		3	3	3	0	3	3	3	3	10	1	1	1	10	10	10	10	10	10	9	12	27	50	20	5	123
'Buttocks','foot','Leg','Low back','Mid-back','Toes'		Leg	7	3	187	4	'High blood pressure'		10	8	10	0	0	4	0	0	10	3	0	2	5	2	10	3	4	10	28	4	25	31	13	7	108
'Abdomen','Neck','Shoulder','Upper back'		Abdomen	9	6	144	2	'Other'		6	5	5	0	0	0	0	0	10	4	3	3	7	3	0	3	5	3	16	0	20	28	3	9	76
'Abdomen','Buttocks','Genitals','Low back','Other'		Other	4	2	96	3	'None'		0	0	0	0	0	0	10	0	8	0	3	10	2	5	0	10	0	9	0	10	17	24	10	4	65
'Arm/hand','Buttocks','Chest','Face','Fingers','foot','Head','Leg','Low back','Neck','Shoulder','Upper back'		Shoulder	8	2	9	6	'Other','Thyroid disease'		5	5	8	0	0	2	0	1	8	6	4	4	5	8	7	5	8	8	18	3	16	37	12	8	94
'Abdomen','Arm/hand','Buttocks','Chest','Fingers','foot','Head','Leg','Low back','Mid-back','Neck','Shoulder','Toes','Upper back'		Low back	7	4	60	160	'High blood pressure','Lung Disease','Other'		8	9	8	6	0	0	0	0	5	4	4	5	3	3	1	8	2	4	31	0	17	17	9	7	81
'Arm/hand','Neck','Shoulder','Upper back'		Shoulder	7	4	40	1	'Other'		3	3	1	0	0	0	0	3	2	5	5	6	1	6	0	8	5	6	7	3	14	20	8	7	59
'Mid-back'		Low back	2	2	11	0	'None'		0	0	0	0	0	0	0	0	0	10	0	0	6	0	0	10	10	0	0	0	20	16	10	2	48
'Abdomen','Arm/hand','Buttocks','Fingers','foot','Head','Leg','Low back','Mid-back','Neck','Shoulder','Toes','Upper back'		Leg, Buttocks	10	5	36	6	'Diabetes','Heart disease','High blood pressure','Thyroid disease'		10	10	10	0	10	5	4	3	10	10	0	0	10	10	10	0	10	10	30	22	20	50	10	10	142
'Abdomen','Buttocks','foot','Genitals','Leg','Low back','Mid-back','Toes'		Buttocks	7	5	83	50	'None'		5	5	0	10	7	7	7	7	5	0	3	5	7	9	0	10	5	5	20	28	22	31	10	7	118
'foot','Head','Leg','Low back','Neck','Shoulder','Upper back'		Shoulder	6	4	468	1	'None'		2	1	2	0	0	0	1	0	2	7	4	4	6	2	8	9	6	7	5	1	15	23	17	6	67
'Arm/hand','Buttocks','Fingers','foot','Head','Leg','Low back','Mid-back','Neck','Other','Shoulder','Toes','Upper back'		Foot, Arm/Hand	8	4	36	12	'Heart disease','High blood pressure','Other'		10	10	10	10	0	8	5	0	10	3	5	3	10	8	7	5	0	5	40	13	19	33	12	8	125
'foot','Low back','Other'		Other	7	4	252	5	'Other'		10	8	10	0	0	6	0	0	5	5	5	3	6	5	0	8	7	4	28	6	17	27	8	7	93
'Leg','Low back','Neck'		Other	4	4	126		'High blood pressure','Thyroid disease'		5	5	7	0	0	0	0	0	2	5	6	5	2	0	5	10	4	3	17	0	14	11	15	4	61
'Buttocks','Leg','Shoulder'		Buttocks	8	5	189		'Other','Thyroid disease'		8	5	10	0	8	0	3	3	10	0	5	0	10	5	0	9	9	10	23	14	25	44	9	8	123
'Chest','foot','Low back'		Low back	5	0	48	3	'Diabetes','Heart disease','High blood pressure','Seizures'		0	9	0	0	9	5	0	10	4	5	2	0	5	4	7	9	10	6	9	24	23	29	16	5	106
'Abdomen','Arm/hand','Fingers','foot','Head','Leg','Low back','Mid-back','Neck','Other','Shoulder','Toes','Upper back'		Abdomen	7	4	120	8	'Other','Thyroid disease'		3	4	0	10	5	5	0	0	5	5	4	0	4	0	10	5	0	2	17	10	21	11	15	7	81
'Arm/hand','foot','Toes'		Foot	10	1	5	3	'Diabetes','Other'		10	0	10	0	7	0	0	0	1	2	5	2	10	8	0	5	10	10	20	7	21	39	5	10	102
'foot','Leg','Low back','Toes'		Low back	9	6	36	3	'High blood pressure'		10	10	10	10	10	10	10	0	10	0	0	0	0	3	5	0	10	8	40	30	30	31	5	9	145
'foot','Head','Leg','Low back','Mid-back','Neck','Shoulder','Toes'		Head	8	3	96	7	'High blood pressure','Other'		5	7	7	0	4	3	0	0	7	3	3	3	6	5	8	3	8	8	19	7	21	34	11	8	100
'foot','Head','Leg','Low back','Mid-back','Neck','Other','Shoulder','Upper back'		Other	4	4	84	5	'High blood pressure'		10	10	10	0	5	8	10	0	5	5	4	3	1	6	8	6	0	5	30	23	18	17	14	4	106
'Arm/hand','Head','Leg','Low back','Mid-back','Neck','Shoulder','Upper back'		Neck	6	2	48	20	'Heart disease','High blood pressure','Other'		5	8	5	6	3	4	7	0	10	2	4	4	8	6	10	3	5	10	24	14	20	39	13	6	116
'Leg','Low back','Mid-back','Upper back'		Low back	7	3	84	3	'High blood pressure','Other'		10	9	10	8	8	10	5	5	10	0	3	7	6	3	10	3	0	8	37	28	20	27	13	7	132
'Arm/hand','Buttocks','foot','Leg','Low back','Shoulder'		Leg	6	3	8	5	'Cancer','High blood pressure','Lung Disease','Other','Thyroid disease'		7	0	4	0	0	0	9	0	0	8	7	8	0	4	2	1	0	5	11	9	7	9	3	6	45
'Buttocks','Genitals','Other'		Buttocks	9	6	10	3	'None'		9	7	8	5	0	0	0	0	10	1	0	5	5	2	0	4	0	7	29	0	24	24	4	9	90
'foot','Leg','Low back'		Low back	6	4	11	32	'Diabetes','Heart disease'		10	8	10	10	5	1	0	0	10	0	3	0	3	2	10	0	10	2	38	6	27	27	10	6	114
'Face','Head','Jaw','Neck'		Jaw, Face	5	3	36	6	'Lung Disease','Other'		10	10	0	0	0	0	0	0	10	5	2	3	0	0	0	2	3	5	20	0	20	18	2	5	65
'Low back','Mid-back','Shoulder'		Low back	3	0	48	2	'Diabetes','Heart disease','High blood pressure','Other'		3	2	10	0	1	2	10	0	10	3	4	4	5	2	8	10	10	5	15	13	19	32	18	3	100
'Arm/hand','Chest','Face','Fingers','foot','Head','Jaw','Leg','Low back','Other','Toes'		Head, Other	7	2	12	5	'High blood pressure'		1	5	2	0	2	2	0	2	7	5	8	6	0	6	0	10	10	2	8	6	11	25	10	7	67
'Low back','Shoulder'		Low back	4	2	247	4	'Heart disease','High blood pressure'		6	7	10	6	4	2	2	1	5	2	3	1	7	7	5	3	5	5	29	9	24	29	8	4	103
'Abdomen','Arm/hand','Buttocks','Face','foot','Jaw','Leg','Low back','Mid-back','Neck','Shoulder','Upper back'		Mid-back	7	5	84	25	'None'		0	4	0	0	0	0	0	0	4	5	0	2	7	8	3	7	7	7	4	0	23	33	10	7	77
'foot','Leg','Low back','Other','Shoulder','Toes'			6	4	348	5	'High blood pressure'		5	4	4	0	0	0	0	0	3	4	6	5	1	0	7	7	0	1	13	0	15	5	14	6	53
'Abdomen','Buttocks','Chest','Face','foot','Head','Jaw','Leg','Low back','Mid-back','Neck','Shoulder','Toes','Upper back'		Shoulder	4	4	60	7	'Diabetes','Heart disease','High blood pressure','Other'		0	1	2	0	0	0	0	0	2	5	5	5	2	2	2	9	6	9	3	0	15	21	11	4	54
'Arm/hand','Buttocks','Chest','Head','Low back','Mid-back','Neck','Shoulder'		Low back	7	4	11	50	'High blood pressure','Other'		6	9	9	0	6	8	8	6	2	2	4	4	2	3	2	9	8	4	24	28	20	19	11	7	109
'Face','Fingers','Head','Jaw','Neck'		Head	6	3	480	8	'Heart disease'		0	5	5	0	7	5	0	0	3	2	4	4	2	0	0	10	7	7	10	12	20	19	10	6	77
'Arm/hand','Fingers','Low back','Mid-back','Neck','Shoulder','Upper back'		Neck	6	3	24	9	'Diabetes','High blood pressure'		10	4	10	10	0	3	0	0	6	8	5	3	4	4	3	10	5	4	34	3	14	23	13	6	93
'Low back','Mid-back','Neck','Shoulder'		Low back	7	0	70	30	'Diabetes','Heart disease'		10	10	10	10	0	0	7	0	10	5	5	5	5	5	7	7	5	5	40	7	15	30	14	7	113
'foot','Leg','Low back','Mid-back','Neck','Shoulder','Toes','Upper back'		Neck, Other	6	4	360	4	'Diabetes','Heart disease'		10	10	10	10	10	3	0	2	10	10	2	3	5	6	0	7	10	5	40	15	15	36	7	6	119
'Abdomen','Face','Genitals','Head','Jaw','Low back','Neck','Other','Shoulder'		Head, Neck	5	7	120	8	'Other'		7	5	3	0	7	7	0	10	10	2	0	3	6	5	10	2	10	10	15	24	25	41	12	5	122
'Buttocks','Jaw','Leg','Low back','Mid-back','Neck'		Low back, Buttocks	7	5	200	4	'Heart disease','High blood pressure'		6	9	5	9	2	2	2	2	9	4	4	4	10	10	10	0	10	7	29	8	18	46	10	7	118
'Leg','Low back','Neck','Shoulder'		Low back	4	1	48	3			10	10	7	0	0	8	0	0	5	2	5	5	2	2	9	10	6	2	27	8	18	17	19	4	93
'Head','Mid-back','Neck','Upper back'		Head	5	5	160	2	'None'		0	1	0	0	0	0	0	0	2	7	8	9	0	0	2	10	0	3	1	0	6	5	12	5	29
'Abdomen','Arm/hand','Buttocks','Face','Fingers','foot','Head','Leg','Low back','Mid-back','Neck','Shoulder','Toes','Upper back'		Neck	5	4	240	13	'Other'		5	9	9	10	10	9	0	5	10	1	0	1	9	5	10	3	10	10	33	24	28	44	13	5	147
'Low back','Neck','Shoulder'		Low back	8	3	240	3	'High blood pressure'		0	0	4	0	1	3	0	1	5	1	2	5	4	0	10	5	2	9	4	5	22	20	15	8	74
'Arm/hand','Shoulder'		Shoulder	8	4	120	9	'None'		4	9	0	0	0	0	0	0	8	3	3	4	5	8	4	3	5	7	13	0	20	33	7	8	81
'Leg','Low back','Shoulder','Upper back'		Leg	6	4	24	3	'High blood pressure','Other'		5	0	2	0	0	0	0	3	7	3	6	3	8	0	0	10	6	2	7	3	18	23	10	6	67
'foot','Leg','Toes'		Foot	8	3	36	3	'Diabetes','High blood pressure'		10	10	10	10	8	8	8	8	7	2	6	2	0	0	2	4	0	2	40	32	20	9	6	8	115
'Abdomen','Arm/hand','Buttocks','Chest','foot','Head','Leg','Low back','Mid-back','Neck','Shoulder','Upper back'		Low back, Toes, Other	8	4	408	90	'High blood pressure'		10	10	10	10	10	4	4	3	0	0	2	2	7	7	10	0	0	2	40	21	26	16	10	8	121
'Abdomen','Arm/hand','Chest','Fingers','foot','Genitals','Head','Jaw','Leg','Low back','Mid-back','Neck','Other','Shoulder','Toes','Upper back'		Neck	5	3	47		'Diabetes','High blood pressure'		3	1	3	0	5	5	3	5	7	3	4	3	3	2	6	1	5	10	7	18	20	27	7	5	84
'Chest','Fingers','Leg','Shoulder'		Shoulder	6	4	54	22	'Heart disease','Lung Disease'		9	5	5	10	7	6	5	4	10	2	4	2	5	5	10	0	0	8	29	22	22	28	10	6	117
'Arm/hand','Buttocks','Leg','Low back'		Leg, Arm/Hand	8	5	216	3	'High blood pressure'		10	10	10	0	10	10	10	10	10	1	1	5	5	0	0	10	0	0	30	40	23	15	10	8	126
'foot','Leg','Low back','Mid-back','Neck'		Low back	9	5	156	2	'High blood pressure'		8	8	10	0	4	0	5	5	9	3	4	1	6	8	10	4	10	10	26	14	22	43	14	9	128
'foot','Head','Low back','Neck','Other','Shoulder'		Low back, Mid-back	7	3	120	6			6	6	6	0	6	4	4	7	9	7	5	5	5	8	10	5	9	9	18	21	13	40	15	7	114
'Buttocks','Leg','Low back','Mid-back'		Low back	5	4	108	4	'Other','Thyroid disease'		5	7	7	0	0	0	0	0	4	5	7	7	3	2	7	8	0	2	19	0	11	11	15	5	61
'Buttocks','foot','Leg','Low back','Toes'		Low back	7	3	84	49	'High blood pressure','Other'		5	3	5	0	2	3	10	0	7	5	4	3	8	5	7	7	7	7	13	15	18	34	14	7	101
'Abdomen','Buttocks','foot','Head','Low back','Neck','Shoulder','Toes','Upper back'		Leg, Foot	8	4	72	2	'Diabetes','Heart disease','High blood pressure'		10	7	8	0	7	6	5	0	8	1	5	7	0	4	7	4	8	5	25	18	17	25	11	8	104
'Arm/hand','Chest','Fingers','Head','Leg','Low back','Neck','Other','Shoulder','Upper back'		Other	6	2	120	7	'Diabetes','Kidney disease','Thyroid disease'		3	4	3	0	0	0	0	3	8	3	2	6	5	2	0	7	7	5	10	3	19	27	7	6	72
'Leg','Low back'		Leg	6	4	72	1	'High blood pressure'		10	10	10	10	0	1	0	0	5	3	0	3	7	7	10	0	7	7	40	1	24	33	10	6	114
'Arm/hand','Fingers','Head','Jaw','Mid-back','Neck','Upper back'		Shoulder	6	0	18	40	'None'		6	9	6	0	2	2	0	3	8	2	3	2	3	1	9	4	8	10	21	7	23	30	13	6	100
'Head','Neck','Shoulder'		Head	2	2	12	17	'Thyroid disease'		2	10	8	0	10	5	10	5	2	1	3	4	0	0	10	2	5	5	20	30	22	12	12	2	98
'Abdomen','Arm/hand','Buttocks','Chest','Face','Fingers','foot','Head','Jaw','Leg','Low back','Mid-back','Neck','Shoulder','Toes','Upper back'		Leg, Foot	9	8	48	6	'Diabetes'		10	8	10	10	10	10	10	10	4	0	0	2	3	0	0	0	6	4	38	40	28	17	0	9	132
'Low back','Neck'		Other	5	2	260	8	'Lung Disease','Other'		3	3	1	2	1	1	0	0	3	4	5	7	5	8	2	6	5	8	9	2	14	29	8	5	67
'Arm/hand','Mid-back','Other','Upper back'		Arm/Hand, Other	6	3	432	2	'Other'		0	7	1	0	0	2	0	2	5	5	5	4	2	3	1	9	5	4	8	4	16	19	10	6	63
'Arm/hand','Buttocks','foot','Leg','Low back','Mid-back','Neck','Shoulder','Upper back'		Low back	7	4	396	19	'None'		6	9	7	7	5	6	6	5	5	3	3	3	4	4	7	5	2	10	29	22	21	25	12	7	116
'Abdomen','Chest','Leg','Low back','Mid-back','Neck','Upper back'		Low back	8	6	80	6	'Other'		7	5	8	10	5	6	0	0	10	2	1	4	7	8	10	2	0	8	30	11	23	33	12	8	117
'Arm/hand','Buttocks','Fingers','foot','Genitals','Head','Leg','Low back','Mid-back','Neck'		Low back	5	3	300	15	'Cancer','Other'		10	4	4	9	4	3	4	4	10	4	4	6	7	3	8	5	10	7	27	15	16	37	13	5	113
'Arm/hand','Chest','Fingers','foot','Head','Jaw','Leg','Low back','Mid-back','Neck','Other','Shoulder','Toes','Upper back'		Leg	6	3	396	2	'High blood pressure'		4	2	3	0	2	2	0	5	2	3	0	4	4	5	8	8	5	5	9	9	23	21	16	6	84
'Shoulder'		Shoulder	8	4	48	16			2	8	2	0	0	3	0	5	7	5	4	4	2	3	5	5	4	4	12	8	17	20	10	8	75
'Arm/hand','Buttocks','Chest','Face','Fingers','Head','Jaw','Low back','Mid-back','Neck','Shoulder','Upper back'		Shoulder	8	3	36	15	'Other','Seizures'		5	8	8	5	7	6	4	7	10	1	2	2	6	6	9	5	8	9	26	24	25	39	14	8	136
'Abdomen','Arm/hand','Buttocks','Chest','Face','Fingers','foot','Genitals','Head','Jaw','Leg','Low back','Mid-back','Neck','Shoulder','Toes','Upper back'		Arm/Hand	10	4	64	26	'High blood pressure'		10	10	10	0	10	10	0	0	10	3	3	2	5	0	0	10	0	10	30	20	22	25	10	10	117
'Arm/hand','foot','Head','Jaw','Leg','Low back','Mid-back','Neck','Other','Shoulder','Toes','Upper back'		Mid-back	8	0	175	3	'Heart disease','Thyroid disease'		3	3	3	5	3	2	1	4	5	0	3	3	3	3	4	4	10	8	14	10	24	29	8	8	93
'Abdomen','Arm/hand','Buttocks','foot','Head','Leg','Low back','Mid-back','Neck','Shoulder','Toes','Upper back'		Low back	8	5	336	20	'Diabetes','Heart disease','High blood pressure','Lung Disease','Other'		10	8	10	9	10	10	0	0	10	2	4	5	8	10	10	3	0	10	37	20	19	38	13	8	135
'Abdomen','Chest','foot','Head','Leg','Low back','Mid-back','Shoulder','Toes','Upper back'		Mid-back	10	8	132	60	'None'		10	10	10	10	10	8	8	8	0	0	3	1	0	9	10	0	5	10	40	34	26	24	10	10	144
'Abdomen','Arm/hand','Buttocks','Chest','Fingers','foot','Genitals','Head','Leg','Low back','Mid-back','Neck','Upper back'		Low back	6	4	344	3	'Cancer','High blood pressure','Other','Thyroid disease'		5	8	10	10	4	4	0	0	7	3	2	3	4	4	5	5	6	7	33	8	22	28	10	6	107
'Arm/hand','Head','Leg','Low back','Shoulder'		Low back	5	0	240	2	'High blood pressure','Other'		6	7	4	0	5	2	1	1	8	3	3	3	7	6	8	3	5	8	17	9	21	34	11	5	97
'Buttocks','Head','Leg','Low back','Other'		Low back	9	5	84	5	'Other'		6	8	10	0	4	0	0	0	8	0	2	2	7	8	8	5	2	10	24	4	26	35	13	9	111
'Arm/hand','Chest','Face','Fingers','foot','Head','Leg','Low back','Mid-back','Toes'		Foot	5	5	72	12	'Lung Disease'		6	4	3	5	2	2	0	4	7	4	4	5	3	2	7	5	6	3	18	8	17	21	12	5	81
'Arm/hand','Buttocks','Low back','Mid-back','Shoulder','Upper back'		Shoulder	8	4	11	30	'Other'		6	8	10	0	3	3	4	0	10	1	2	1	9	9	10	0	2	10	24	10	26	40	10	8	118
'Arm/hand','foot','Low back','Other','Shoulder'		Low back, Other	7	4	192	4	'High blood pressure','Other'		9	5	10	5	0	0	2	7	7	4	6	4	9	3	8	5	0	7	29	9	16	26	13	7	100
'Arm/hand','Chest','Fingers','foot','Leg','Shoulder','Toes'		Foot	6	4	66	3	'None'		6	6	10	1	1	1	1	0	10	3	2	0	8	8	10	2	4	8	23	3	25	38	12	6	107
'foot','Leg','Low back','Neck','Other','Shoulder','Toes'		Low back	6	6	288	14	'High blood pressure','Thyroid disease'		10	10	10	10	3	3	3	0	10	3	4	5	3	0	10	5	3	10	40	9	18	26	15	6	114
'Arm/hand','Buttocks','foot','Leg','Low back','Mid-back','Shoulder','Toes','Upper back'		Foot	8	5	8	3	'Other'		9	9	10	9	10	8	7	2	10	4	3	5	6	0	7	6	8	5	37	27	18	29	13	8	132
'Abdomen','Arm/hand','Buttocks','Fingers','foot','Head','Leg','Low back','Mid-back','Neck','Other','Shoulder','Toes'		Other	8	3	120	0	'Other','Thyroid disease'		7	10	10	0	0	0	0	0	10	5	5	0	10	10	0	10	0	10	27	0	20	40	10	8	105
'Arm/hand','Buttocks','Fingers','foot','Leg','Other','Shoulder','Toes'		Other	6	5	39	2	'Other'		8	5	10	0	5	0	3	3	8	5	7	8	1	0	0	10	8	5	23	11	10	22	10	6	82
'Buttocks','Low back','Mid-back','Neck','Shoulder','Upper back'		Low back	3	1	168	18	'None'		2	10	0	0	0	0	0	0	2	6	6	5	3	7	5	7	3	9	12	0	13	24	12	3	64
'Arm/hand','Buttocks','Face','Fingers','foot','Head','Leg','Low back','Other','Toes'		Low back	8	6	420	14	'High blood pressure','Other','Thyroid disease'		10	10	10	0	0	3	0	0	9	6	5	5	8	4	0	7	8	7	30	3	14	36	7	8	98
'Arm/hand','Buttocks','Fingers','foot','Leg','Low back','Mid-back','Neck','Other','Shoulder','Toes','Upper back'		Low back	7	7	528	6	'Heart disease','High blood pressure','Lung Disease'		10	10	10	8	0	0	0	0	8	4	4	4	8	8	7	8	7	7	38	0	18	38	15	7	116
'Arm/hand','Head','Leg','Low back','Neck','Other','Shoulder','Upper back'		Shoulder	6	4	96	0	'Other','Seizures'		5	6	7	10	0	2	0	6	7	4	4	3	7	5	10	0	8	7	28	8	19	34	10	6	105
'Buttocks','foot','Head','Leg','Low back','Neck','Upper back'		Low back	8	5	144	2	'High blood pressure','Lung Disease'		9	9	8	0	7	0	5	0	9	4	3	0	10	10	0	4	0	10	26	12	23	39	4	8	112
'Abdomen','foot','Head','Leg','Low back','Mid-back','Toes','Upper back'		Leg	7	5	72	1	'Thyroid disease'		8	7	7	0	0	0	0	5	7	6	3	5	6	7	8	6	7	8	22	5	16	35	14	7	99
'Arm/hand','Head','Low back','Mid-back','Neck','Shoulder'		Low back	4	1	6	12			2	2	2	0	0	0	0	0	4	7	4	8	3	4	3	8	2	7	6	0	11	20	11	4	52
'Arm/hand','Head','Jaw','Leg','Low back','Neck','Other','Shoulder'		Leg, Arm/Hand	7	5	192	0	'Liver disease','Seizures','Thyroid disease'		9	6	8	9	8	7	7	6	8	1	1	1	9	9	9	0	1	9	32	28	27	36	9	7	139
'Leg','Low back'		Low back	5	5	84	8	'Heart disease','Other'		8	8	6	0	2	1	2	0	6	5	4	5	4	2	10	5	6	5	22	5	16	23	15	5	86
'Arm/hand','Head','Shoulder','Upper back'		Shoulder	5	3	15	17	'Other','Thyroid disease'		0	6	0	0	1	2	0	2	0	8	4	4	0	6	4	9	5	6	6	5	14	17	13	5	60
'Fingers','Head','Leg','Low back','Neck','Shoulder','Upper back'		Head, Fingers	4	5	40	4	'Diabetes','High blood pressure','Liver disease','Thyroid disease'		0	0	4	0	0	0	0	0	0	6	6	5	0	0	0	0	3	2	4	0	13	5	0	4	26
'Abdomen','Arm/hand','Buttocks','Chest','Face','Fingers','foot','Head','Jaw','Leg','Low back','Mid-back','Neck','Shoulder','Toes'		Foot	4	3	264	5	'Diabetes','Kidney disease','Liver disease','Other'		8	7	6	0	4	0	0	1	10	3	1	4	8	7	6	5	10	10	21	5	22	45	11	4	108
'Abdomen','Arm/hand','Buttocks','Fingers','foot','Genitals','Head','Leg','Low back','Neck','Shoulder','Toes','Upper back'		Low back	8	6	132	3	'Diabetes','High blood pressure'		9	10	9	10	10	10	10	9	10	1	3	0	10	10	10	1	10	8	38	39	26	48	11	8	170
'Abdomen','Arm/hand','Buttocks','Fingers','foot','Genitals','Head','Leg','Low back','Mid-back','Neck','Other','Shoulder','Toes','Upper back'		Low back	7	4	96	15	'Other'		7	7	8	0	4	0	5	0	7	4	3	4	4	4	3	5	7	6	22	9	19	28	8	7	93
'foot','Leg','Low back','Upper back'		Low back	8	4	132	3	'None'		10	10	7	0	10	10	9	9	10	6	0	0	10	9	9	9	6	8	27	38	24	43	18	8	158
'Leg','Low back','Other'		Low back	6	3	6	4	'Heart disease','High blood pressure'		3	0	10	10	0	0	3	0	10	0	0	0	10	10	8	5	8	10	23	3	30	48	13	6	123
'Abdomen','Arm/hand','Buttocks','Face','Fingers','foot','Head','Leg','Low back','Mid-back','Neck','Shoulder','Toes','Upper back'		Neck, Shoulder	7	4	120	24	'High blood pressure','Lung Disease','Other'		5	6	5	6	3	1	0	2	0	5	3	3	0	0	7	3	0	2	22	6	19	2	10	7	66
'Arm/hand','Fingers','Genitals','Head','Neck','Shoulder'		Neck	8	4	168	3	'None'		8	10	10	9	9	6	3	8	9	2	3	3	7	6	0	3	8	9	37	26	22	39	3	8	135
'foot','Leg','Low back','Toes'		Foot	5	3	36	3	'Thyroid disease'		10	5	10	10	5	1	0	5	8	8	4	5	2	0	2	8	5	2	35	11	13	17	10	5	91
'Leg','Low back'		Low back	5	5	60	10	'None'		5	0	7	3	0	0	0	0	0	8	8	7	3	5	5	8	0	3	15	0	7	11	13	5	51
'Head','Low back','Mid-back','Neck'		Low back	7	2	50	6	'Other'		10	9	10	10	10	5	9	5	5	0	2	1	7	7	7	0	10	10	39	29	27	39	7	7	148
'Low back','Neck'		Low back	7	4	132		'None'		7	6	6	5	4	4	4	4	7	4	4	5	5	8	7	5	4	8	24	16	17	32	12	7	108
'Arm/hand','Mid-back','Neck','Shoulder','Upper back'		Neck	7	5	120	48	'High blood pressure'		4	10	4	0	0	2	1	0	8	2	2	1	2	2	1	3	4	5	18	3	25	21	4	7	78
'Abdomen','Arm/hand','Chest','Face','Fingers','foot','Head','Jaw','Leg','Low back','Mid-back','Neck','Shoulder','Toes','Upper back'		Head	7	4	58	8	'High blood pressure','Kidney disease','Other'		5	3	8	0	0	1	0	0	10	0	1	0	10	10	0	10	3	8	16	1	29	41	10	7	104
'Arm/hand','Face','Head','Jaw','Leg','Low back','Mid-back','Neck','Other','Shoulder','Upper back'		Low back	6	4	168	7	'None'		9	10	10	0	2	0	0	0	10	5	4	5	6	3	1	4	3	6	29	2	16	28	5	6	86
'Arm/hand','foot','Leg','Shoulder'		Leg	6	4	32	40	'Other'		6	3	5	0	2	1	0	1	3	5	5	5	4	2	4	7	4	4	14	4	15	17	11	6	67
'Leg','Low back','Mid-back'		Low back	6	0	187	12	'Lung Disease'		7	7	5	0	0	0	0	4	7	2	2	3	8	8	10	3	7	8	19	4	23	38	13	6	103
'Arm/hand','foot','Leg','Low back','Shoulder','Toes'		Leg	10	5	42	24	'Diabetes','High blood pressure'		10	10	10	10	7	6	3	10	10	0	1	1	10	6	10	0	7	10	40	26	28	43	10	10	157
'foot','Leg','Low back','Toes'		Foot	9	0	29	15	'Diabetes','High blood pressure','Other'		10	8	10	0	10	10	5	5	10	0	0	0	10	10	10	5	10	9	28	30	30	49	15	9	161
'Arm/hand','Low back','Neck','Shoulder'		Low back	7	4	150	0	'Heart disease'		5	6	6	2	0	0	0	1	8	4	6	8	4	3	5	8	2	8	19	1	12	25	13	7	77
'Low back'		Low back	6	2	144	3	'High blood pressure'		6	6	7	2	6	6	7	6	9	3	3	2	6	6	7	4	6	6	21	25	22	33	11	6	118
'Leg','Low back','Mid-back'		Leg	7	0	182	50	'Other'		10	10	10	10	0	4	4	3	3	5	5	6	4	3	5	5	4	6	40	11	14	20	10	7	102
'Buttocks','Leg','Low back'		Low back	4	2	48	6	'High blood pressure'		2	8	5	0	3	3	3	3	9	4	3	4	8	8	10	8	6	8	15	12	19	39	18	4	107
'Arm/hand','foot','Jaw','Leg','Low back','Mid-back','Neck'		Neck	7	4	7	50	'Diabetes','High blood pressure','Other','Seizures'		5	5	8	10	3	0	3	0	7	2	3	3	0	4	7	6	4	8	28	6	22	23	13	7	99
'Arm/hand','Fingers','foot','Head','Leg','Low back','Neck','Shoulder','Upper back'		Arm/Hand	9	5	180	4	'Diabetes','Heart disease','High blood pressure'		8	5	9	0	3	4	3	6	6	3	4	3	4	3	6	5	9	4	22	16	20	26	11	9	104
'Leg','Low back'		Leg	3	0	12	32	'Other'		3	7	0	0	0	2	0	0	8	7	8	9	2	5	8	0	0	5	10	2	6	20	8	3	49
'foot','Head','Leg','Mid-back','Shoulder'		Shoulder	8	2	144	4	'None'		3	5	8	0	0	2	0	0	0	2	5	3	0	1	6	7	1	5	16	2	20	7	13	8	66
'Arm/hand','Head','Leg','Low back','Neck','Shoulder','Upper back'		Neck	6	4	156	8	'Heart disease','High blood pressure','Other'		6	5	8	0	3	3	0	3	8	4	3	3	5	7	8	7	9	7	19	9	20	36	15	6	105
'Leg','Mid-back','Upper back'		Mid-back	5	4	72	9	'Diabetes','Heart disease','High blood pressure','Thyroid disease'		8	4	5	9	2	1	0	0	2	6	6	4	3	6	0	10	6	6	26	3	14	23	10	5	81
'Abdomen','Arm/hand','Fingers','foot','Genitals','Leg','Low back','Neck','Other','Shoulder','Upper back'		Low back	7	3	48	12	'High blood pressure','Liver disease'		6	7	7	0	2	2	0	0	9	4	2	3	9	5	3	8	7	2	20	4	21	32	11	7	95
'Abdomen','Arm/hand','Buttocks','Fingers','foot','Head','Leg','Low back','Mid-back','Neck','Other','Shoulder','Toes','Upper back'		Foot	10	5	48	0	'High blood pressure','Other'		10	8	10	9	10	2	0	3	5	0	0	1	3	7	9	0	2	4	37	15	29	21	9	10	121
'Abdomen','Arm/hand','Face','Fingers','foot','Genitals','Head','Leg','Low back','Mid-back','Other','Shoulder','Toes','Upper back'		Shoulder	7	2	14	40	'None'		10	8	0	2	0	0	0	0	10	1	4	3	5	4	8	6	5	9	20	0	22	33	14	7	96
'Abdomen','Head','Low back','Neck','Shoulder'		Head, Neck	6	3	170	11	'Other'		5	3	3	0	0	0	0	0	8	3	1	0	5	6	0	5	5	3	11	0	26	27	5	6	75
'Face','Head','Other'		Head, Face, Other	8	3	360	3	'None'		6	2	3	1	1	1	1	1	8	2	3	1	8	6	5	2	7	7	12	4	24	36	7	8	91
'Buttocks','Chest','Face'		Mid Back	4	5	3	6	'Diabetes','High blood pressure','Kidney disease','Other'		8	7	9	7	7	8	8	8	7	8	7	6	7	8	7	6	6	6	31	31	9	34	13	4	122
'Buttocks'		Buttocks	6	0	312	1	'Diabetes'		0	0	0	0	0	0	7	0	5	5	5	5	0	5	3	0	9	3	0	7	15	22	3	6	53
'Abdomen','Arm/hand','Buttocks','Chest','Face','Fingers','foot','Genitals','Head','Jaw','Leg','Low back','Mid-back','Neck','Shoulder','Toes','Upper back'		Low back	7	4	120	7	'None'		10	10	10	10	5	0	10	5	5	5	1	1	9	10	0	3	10	10	40	20	23	44	3	7	137
'Low back','Mid-back','Neck','Shoulder','Toes','Upper back'		Neck	9	4	66	3	'None'		6	8	7	3	4	2	1	2	7	2	3	3	5	4	5	2	6	9	24	9	22	31	7	9	102
'foot','Low back'		Low back	6	4	100	2	'High blood pressure'		0	5	0	0	0	0	0	0	0	5	5	5	0	3	2	5	0	4	5	0	15	7	7	6	40
'Low back','Mid-back','Neck','Shoulder'		Shoulder	6	3	120	5	'None'		2	7	7	0	8	9	9	9	2	4	4	4	10	8	8	5	7	8	16	35	18	35	13	6	123
'Leg','Low back','Mid-back','Upper back'		Low back	8	5	164	2	'Heart disease'		5	6	5	0	4	3	1	1	7	5	6	4	6	6	7	6	6	7	16	9	15	32	13	8	93
'Head','Leg','Mid-back'		Leg	9	0	84	0	'None'		10	10	10	10	0	0	0	0	2	3	5	5	9	9	10	5	5	8	40	0	17	33	15	9	114
'Buttocks','Low back','Neck','Upper back'		Upper back	8	4	78	20	'Diabetes','Seizures'		4	7	5	0	2	3	1	3	8	2	1	5	2	8	5	6	3	7	16	9	22	28	11	8	94
'Arm/hand','Leg','Low back','Mid-back','Other','Shoulder'		Leg, Other	9	7	120	12	'Diabetes','High blood pressure','Other'		8	8	9	10	6	6	6	6	10	3	5	4	9	9	2	5	8	9	35	24	18	45	7	9	138
'Abdomen','Buttocks','foot','Leg'		Abdomen	6	4	180	3	'None'		10	10	10	10	10	10	10	3	5	1	6	7	2	0	2	10	1	3	40	33	16	11	12	6	118
'Other'		Other	6	3	56	5	'None'		0	8	0	0	0	0	0	0	8	8	8	6	4	4	10	10	10	4	8	0	8	30	20	6	72
'Leg','Low back','Mid-back'		Low back	10	7	48	3	'None'		6	7	5	5	8	4	6	7	9	7	4	5	6	4	9	5	7	9	23	25	14	35	14	10	121
'Head','Leg','Low back','Mid-back','Neck','Shoulder'		Other	3	3	60	4	'Diabetes','Other'		2	3	3	0	1	1	1	1	8	6	2	4	9	8	5	5	6	6	8	4	18	37	10	3	80
'Shoulder'		Shoulder	6	4	24	6	'None'		6	5	5	5	5	5	5	5	6	8	8	8	6	3	5	7	5	4	21	20	6	24	12	6	89
'foot','Leg','Low back','Neck','Shoulder'		Low back, Neck, Foot	4	2	84	1	'Diabetes','High blood pressure'		4	4	6	0	2	4	4	4	7	4	3	3	8	3	3	4	2	9	14	14	20	29	7	4	88
'Low back','Neck'		Neck	7	4	144	2	'None'		5	10	3	0	0	0	0	0	0	1	7	0	4	4	3	8	5	2	18	0	22	15	11	7	73
'Arm/hand','foot','Leg','Low back','Toes'		Leg	8	5	159	3	'Thyroid disease'		8	10	10	0	0	0	0	0	2	1	5	5	0	1	2	4	0	4	28	0	19	7	6	8	68
'Head','Other'		Head	8	4	19	3	'None'		2	2	2	0	0	0	0	0	4	5	5	5	2	3	3	7	8	5	6	0	15	22	10	8	61
'Arm/hand','Buttocks','foot','Head','Leg','Low back','Mid-back','Neck','Shoulder','Toes','Upper back'		Low back	8	4	192	40	'Thyroid disease'		6	6	4	4	4	2	4	4	8	5	4	5	3	4	7	7	7	8	20	14	16	30	14	8	102
'Abdomen','Arm/hand','Buttocks','Chest','Fingers','foot','Head','Leg','Low back','Mid-back','Neck','Toes','Upper back'		Low back	7	0	86	42	'Cancer','High blood pressure'		10	10	9	1	10	0	5	10	10	1	1	1	6	6	9	8	8	9	30	25	27	39	17	7	145
'Arm/hand','Buttocks','Fingers','foot','Genitals','Leg','Low back','Other','Toes'		Other	8	4	420	3	'Cancer','High blood pressure','Lung Disease'		10	10	10	10	10	0	10	0	6	2	3	3	6	0	0	7	5	6	40	20	22	23	7	8	120
'Leg','Low back','Mid-back','Toes','Upper back'		Leg	8	4	240	7	'None'		7	0	6	8	10	8	3	4	9	1	5	2	5	3	9	3	5	8	21	25	22	30	12	8	118
'Leg','Low back','Mid-back','Other','Toes','Upper back'		Leg	8	6	300	4	'High blood pressure','Other'		10	9	10	10	8	8	9	9	10	1	5	4	9	9	6	6	9	9	39	34	20	46	12	8	159
'foot','Leg','Shoulder','Toes'		Foot	8	6	74	65	'None'		10	10	10	10	10	10	0	5	10	4	5	4	5	8	7	7	8	7	40	25	17	38	14	8	142
'foot','Leg','Low back','Toes'		Toes	9	6	120	40	'High blood pressure','Lung Disease'		10	6	10	0	3	0	0	0	7	4	4	5	9	8	1	9	9	6	26	3	17	39	10	9	104
'Arm/hand'		Arm/Hand	5	4	174	0	'High blood pressure'		2	8	0	0	0	1	0	1	8	3	4	4	2	2	0	10	6	8	10	2	19	26	10	5	72
'Arm/hand','Buttocks','Fingers','foot','Genitals','Leg','Low back','Mid-back','Neck','Shoulder','Upper back'		Leg	9	0	96	0	'None'		10	10	10	0	8	8	0	5	10	2	4	5	5	3	5	5	0	6	30	21	19	24	10	9	113
'Leg','Low back','Other','Upper back'		Leg, Low back, Mid-back	8	4	396	24	'Other'		8	6	8	0	6	6	6	6	8	3	3	2	9	5	6	3	8	3	22	24	22	33	9	8	118
'Buttocks','foot','Leg','Low back','Mid-back','Shoulder','Toes'		Low back	10	5	134	3	'High blood pressure'		7	9	9	6	0	6	0	0	7	5	4	5	9	9	10	7	3	8	31	6	16	36	17	10	116
'Low back','Mid-back','Neck'		Upper back	6	3	48	6	'None'		7	9	10	0	7	7	8	7	7	7	3	7	8	9	9	7	8	9	26	29	13	41	16	6	131
'Low back'		Low back	6	6	142	9	'High blood pressure'		10	10	10	10	7	7	7	7	10	0	7	8	8	9	7	7	8	9	40	28	15	44	14	6	147
'Head','Neck','Upper back'		Head	6	2	36	2	'Other'		2	2	3	0	1	2	2	2	5	8	6	6	7	5	6	5	5	6	7	7	10	28	11	6	69
'Abdomen','Arm/hand','Buttocks','Chest','Head','Leg','Mid-back','Neck','Shoulder'		Mid-back	8	0	24	5	'None'		2	8	0	0	0	0	10	5	6	5	6	7	4	5	0	8	5	9	10	15	12	29	8	8	82
'Arm/hand','Face','Head','Low back','Neck','Shoulder'		Neck	8	4	60	3	'Diabetes','Heart disease'		9	9	10	0	4	2	0	7	8	8	8	0	9	10	10	0	10	10	28	13	14	47	10	8	120
'Head','Neck','Upper back'		Neck	6	3	72	15	'None'		3	4	3	0	0	0	0	3	9	3	3	3	5	3	6	3	4	10	10	3	21	31	9	6	80
'Abdomen','Face','Head','Leg','Neck','Shoulder'		Head	8	6	192	4	'None'		8	10	5	5	0	2	0	3	7	4	5	7	0	0	10	0	7	6	28	5	14	20	10	8	85
'Abdomen','Buttocks','Chest','foot','Leg','Low back','Other'		Chest	6	3	72	2	'None'		7	8	6	0	0	2	0	0	6	4	3	3	5	6	8	4	3	5	21	2	20	25	12	6	86
'Abdomen','Buttocks','Chest','Head','Leg','Low back','Mid-back','Neck','Shoulder','Upper back'		Mid-back	7	5	120	5	'Diabetes','Other'		10	5	10	10	7	5	3	8	7	0	6	5	6	0	4	8	3	5	35	23	19	21	12	7	117
'Low back','Other','Shoulder'		Low back	3	1	115	1	'None'		10	2	10	10	1	1	1	1	0	7	4	5	2	1	3	8	0	2	32	4	14	5	11	3	69
'Arm/hand','Buttocks','Leg','Low back','Neck','Other','Shoulder'		Leg, Other	5	3	108	5	'Thyroid disease'		5	4	3	0	5	3	2	3	4	7	5	5	4	2	0	8	3	8	12	13	13	21	8	5	72
'Abdomen','Arm/hand','Buttocks','Fingers','foot','Leg','Low back','Shoulder','Toes'		Leg	10	5	240	3	'Other','Thyroid disease'		10	0	10	10	10	5	2	0	5	8	4	2	2	10	0	8	9	10	30	17	16	36	8	10	117
'Head','Leg','Low back'		Leg	7	3	33	35	'High blood pressure'		6	8	7	0	0	0	0	3	3	4	4	4	1	0	4	8	10	7	21	3	18	21	12	7	82
'foot','Leg','Low back','Toes','Upper back'		Leg, Toes	6	3	10	105	'High blood pressure'		10	8	10	0	0	9	0	0	7	2	0	3	8	10	10	5	9	10	28	9	25	44	15	6	127
'Buttocks','Low back'		Buttocks	6	3	45	12	'High blood pressure'		10	5	3	0	2	0	0	0	6	3	7	5	6	6	3	9	10	7	18	2	15	35	12	6	88
'Leg'		Leg, Other	7	4	24	15	'Diabetes','Other','Thyroid disease'		8	10	9	6	7	7	7	7	5	2	2	2	4	7	8	4	7	7	33	28	24	30	12	7	134
'Leg','Low back'		Leg	7	3	72	4	'None'		8	7	8	7	5	5	5	5	5	7	7	8	5	8	3	9	7	5	30	20	8	30	12	7	107
'foot','Leg'		Foot	6	0	20	6	'Diabetes'		9	9	9	0	5	5	2	2	8	2	3	2	6	7	2	2	10	8	27	14	23	39	4	6	113
'Leg','Low back'		Low back	8	6	150	5	'None'		6	7	5	0	6	6	6	6	2	2	3	4	1	0	8	4	0	1	18	24	21	4	12	8	87
'Leg'		Leg	6	2	8	30	'High blood pressure'		4	10	3	0	0	0	0	0	10	0	8	1	10	4	8	8	6	6	17	0	21	36	16	6	96
'Abdomen','Arm/hand','Buttocks','Chest','Face','foot','Head','Leg','Mid-back','Neck','Shoulder','Toes','Upper back'		Chest	7	4	36	0	'None'		10	7	10	10	8	5	8	6	8	6	8	6	2	2	2	5	6	6	37	27	10	24	7	7	112
'Abdomen','Buttocks','foot','Leg','Low back','Mid-back','Neck','Upper back'		Low back	7	5	24	30	'None'		8	8	10	0	0	0	10	0	10	5	4	4	6	8	10	7	4	4	26	10	17	32	17	7	109
'foot','Other','Toes'		Foot	8	5	144	28	'High blood pressure'		7	5	7	2	0	0	0	0	4	5	6	7	0	0	2	9	0	5	21	0	12	9	11	8	61
'Arm/hand','Other','Upper back'		Arm/Hand, Other	10	5	108	12	'Other'		0	5	0	0	5	5	5	5	5	1	3	5	5	5	10	3	7	7	5	20	21	29	13	10	98
		Leg, Low back, Mid-back, Upper back, Head, Neck, Shoulder, Foot, Arm/Hand, Fingers, Toes, Other	7	5	600	7	'Other'		4	3	4	0	4	3	0	0	10	5	6	6	8	7	0	6	3	10	11	7	13	38	6	7	82
'Chest','Fingers','foot','Leg','Low back','Toes'		Foot	6	4	36	36	'None'		7	7	6	0	5	6	1	5	9	3	3	5	8	6	6	7	7	8	20	17	19	38	13	6	113
'Buttocks','foot','Leg','Low back','Toes'		Low back	7	4	216	2	'Diabetes','High blood pressure'		10	8	9	0	6	5	3	6	8	2	4	1	8	6	10	3	7	5	27	20	23	34	13	7	124
'foot','Head','Leg','Low back','Toes'		Foot	6	4	132	50	'High blood pressure','Other'		9	4	8	0	0	5	0	6	6	3	6	3	2	4	8	6	8	9	21	11	18	29	14	6	99
'Arm/hand','Buttocks','Fingers','Head','Leg','Low back','Mid-back','Neck','Shoulder','Toes','Upper back'		Low back	8	1	60	0	'Diabetes','High blood pressure','Liver disease','Lung Disease'		6	6	7	9	5	5	6	4	7	0	2	0	5	5	10	2	5	8	28	20	28	30	12	8	126
'Arm/hand','Buttocks','Fingers','Genitals','Head','Leg','Low back','Neck','Shoulder','Upper back'		Shoulder, Arm/Hand	10	7	45	2	'None'		7	10	10	0	10	10	0	10	10	7	8	4	3	3	10	3	8	8	27	30	11	32	13	10	123
'Arm/hand','Buttocks','Chest','Face','Fingers','foot','Head','Leg','Low back','Mid-back','Neck','Shoulder','Toes','Upper back'		Upper back	6	6	576	24	'Heart disease','Other'		10	6	7	7	2	5	5	5	7	4	3	3	8	0	7	4	0	6	30	17	20	21	11	6	105
'Arm/hand','Buttocks','Chest','Face','Fingers','foot','Head','Jaw','Leg','Low back','Mid-back','Neck','Shoulder','Toes','Upper back'		Arm/Hand	2	2	144	2	'Other','Thyroid disease'		2	3	1	0	0	0	0	2	5	4	1	1	8	7	7	2	6	5	6	2	24	31	9	2	74
'foot','Low back','Neck','Other','Shoulder'		Low back	3	2	17	16	'None'		1	3	1	0	0	1	0	0	5	5	5	5	3	3	10	5	3	5	5	1	15	19	15	3	58
'Abdomen','Arm/hand','Buttocks','Chest','Fingers','foot','Head','Leg','Low back','Mid-back','Neck','Shoulder','Toes','Upper back'		Low back	8	5	180	5	'None'		9	9	9	10	6	7	5	5	9	5	1	2	2	2	1	0	5	10	37	23	22	28	1	8	119
'Buttocks','Face','foot','Genitals','Leg','Low back','Mid-back','Neck','Other','Shoulder','Upper back'		Genitals	7	5	60	3	'Other'		4	5	10	10	10	10	5	2	7	0	1	0	2	1	7	2	0	5	29	27	29	15	9	7	116
'Buttocks','foot','Leg','Low back','Mid-back','Neck','Toes'		Low back	4	1	324	50	'High blood pressure'		10	5	10	0	10	2	4	0	5	5	2	3	7	4	10	7	10	5	25	16	20	31	17	4	113
'Buttocks','foot','Leg','Low back'		Low back	8	0	56	31	'Other'		10	10	10	5	10	10	10	10	10	0	2	2	10	10	10	4	10	10	35	40	26	50	14	8	173
'Arm/hand','Leg','Mid-back','Neck','Shoulder','Upper back'		Neck	4	2	18	95	'Diabetes'		8	10	8	10	2	2	2	2	10	3	3	4	7	5	10	7	7	10	36	8	20	39	17	4	124
'Arm/hand','Buttocks','Fingers','foot','Jaw','Leg','Low back','Neck','Toes'		Foot	8	5	63	25	'Diabetes','High blood pressure','Thyroid disease'		10	9	10	10	10	3	3	0	5	1	1	2	2	0	1	5	5	4	39	16	26	16	6	8	111
'Arm/hand','Buttocks','Chest','Face','Fingers','foot','Head','Jaw','Leg','Low back','Mid-back','Neck','Shoulder','Toes','Upper back'		Low back, Other	6	5	120	1	'Thyroid disease'		5	10	5	0	5	4	0	4	4	7	5	5	10	7	7	6	7	8	20	13	13	36	13	6	101
'Arm/hand','Buttocks','Face','Fingers','foot','Head','Jaw','Leg','Low back','Mid-back','Neck','Shoulder','Toes','Upper back'		Arm/Hand	8	5	96	3	'None'		2	10	9	0	5	5	5	4	10	3	5	0	10	10	10	2	5	5	21	19	22	40	12	8	122
'Arm/hand','Buttocks','Fingers','foot','Leg','Low back','Mid-back','Neck','Shoulder','Toes','Upper back'		Arm/Hand	8	5	108	17	'Diabetes','Heart disease'		8	8	8	0	7	9	10	7	8	1	1	1	8	7	9	4	5	6	24	33	27	34	13	8	139
'Fingers','foot','Low back','Toes'		Foot	6	3	18	3	'High blood pressure','Thyroid disease'		10	10	9	10	0	0	0	0	10	0	0	1	9	0	0	1	2	2	39	0	29	23	1	6	98
'Abdomen','Arm/hand','Buttocks','Chest','Face','Fingers','foot','Genitals','Head','Jaw','Leg','Low back','Mid-back','Neck','Other','Shoulder','Toes','Upper back'		Upper back	7	4	72	12	'Other'		9	5	10	9	8	8	3	2	10	0	0	0	8	7	8	0	10	9	33	21	30	44	8	7	143
'Arm/hand','Face','Head','Jaw','Neck','Shoulder'		Shoulder	7	0	48	30	'Other'		6	10	6	0	6	5	5	6	9	5	3	4	7	6	10	5	9	8	22	22	18	39	15	7	123
'Arm/hand','Fingers','Neck','Shoulder','Upper back'		Neck	1	8	400	5	'Lung Disease','Thyroid disease'		0	8	5	0	0	2	0	0	10	6	4	4	4	6	6	6	5	8	13	2	16	33	12	1	77
'Arm/hand','Chest','foot','Head','Leg','Low back','Mid-back','Neck','Other','Shoulder'		Low back	7	4	36	3	'Heart disease','High blood pressure','Other'		10	8	10	10	5	7	6	5	10	1	0	1	10	10	10	3	10	8	38	23	28	48	13	7	157
'Buttocks','foot','Leg','Low back','Mid-back','Toes'		Leg, Low back, Buttocks, Foot, Toes	9	4	72	4	'None'		10	10	10	0	5	4	3	0	0	0	8	0	0	0	5	0	0	0	30	12	22	0	5	9	78
'Low back','Neck'		Low back	5	3	42	5	'Cancer','High blood pressure','Thyroid disease'		8	1	1	0	0	0	0	0	7	9	8	7	2	2	2	0	6	1	10	0	6	18	2	5	41
'Arm/hand','foot','Leg','Other'		Foot	5	3	144	2	'None'		10	10	10	10	10	3	0	3	9	3	0	6	6	6	7	4	8	7	40	16	21	36	11	5	129
'Leg','Low back','Mid-back'		Leg, Low back	9	5	96	10	'None'		10	10	10	0	7	5	4	4	8	9	2	3	7	8	10	0	8	10	30	20	16	41	10	9	126
'Head','Low back','Neck','Shoulder'		Neck	8	5	60	10	'Diabetes','High blood pressure'		6	6	6	6	5	3	10	0	5	2	0	0	8	10	0	10	7	7	24	18	28	37	10	8	125
'Arm/hand'		Arm/Hand	4	2	94	0	'Liver disease'		0	10	0	5	10	0	0	2	0	3	2	5	0	0	0	10	3	2	15	12	20	5	10	4	66
'Abdomen','foot','Leg','Toes'		Leg	10	5	54	3	'Thyroid disease'		10	10	10	10	8	10	10	8	10	0	0	1	2	5	3	6	8	8	40	36	29	33	9	10	157
'Abdomen','Genitals','Leg'		Abdomen	7	4	23	8	'None'		10	10	10	10	8	8	8	5	9	1	4	5	8	5	2	5	9	5	40	29	20	36	7	7	139
'Chest','Low back','Mid-back','Neck','Upper back'		Neck	8	2	6	10	'None'		10	10	10	10	10	10	10	10	10	0	0	4	7	10	10	0	10	10	40	40	26	47	10	8	171
'Abdomen','Arm/hand','Chest','Fingers','Leg','Shoulder'		Abdomen	6	5	120	60	'None'		3	4	0	0	0	0	0	0	7	6	1	2	3	5	3	6	5	0	7	0	21	20	9	6	63
'Arm/hand','Fingers','foot','Leg','Low back','Neck','Other','Shoulder','Toes'		Other	4	7	180	3	'Diabetes'		3	2	5	0	5	5	5	3	7	2	2	4	2	1	8	8	10	7	10	18	22	27	16	4	97
'Abdomen','Arm/hand','Face','Fingers','foot','Head','Jaw','Leg','Low back','Neck','Shoulder','Toes','Upper back'		Low back	4	2	204	6	'Diabetes','Lung Disease','Thyroid disease'		8	7	7	6	7	7	0	4	8	1	0	6	5	6	8	5	10	10	28	18	23	39	13	4	125
'Arm/hand','Other'		Other	6	3	13	12	'High blood pressure','Seizures','Thyroid disease'		0	9	0	0	0	3	0	0	6	4	5	5	9	6	10	8	0	5	9	3	16	26	18	6	78
'Abdomen','Arm/hand','Buttocks','Chest','Face','Jaw','Low back','Mid-back','Neck','Other','Shoulder','Upper back'		Other	7	3	48	2	'Other'		6	0	7	0	5	0	0	4	8	6	5	7	4	5	4	7	6	7	13	9	12	30	11	7	82
'Arm/hand','foot','Leg','Neck','Shoulder'			4	2	20	1	'High blood pressure'		4	7	5	0	0	1	0	3	4	5	5	5	0	0	5	9	0	7	16	4	15	11	14	4	64
'Abdomen'		Abdomen	7	3	396	2	'None'		0	3	2	0	0	4	8	0	6	3	2	3	3	5	3	6	8	8	5	12	22	30	9	7	85
'Abdomen','foot','Leg','Low back','Toes'		Leg, Foot	8	3	276	13	'None'		4	0	7	3	0	0	0	0	5	4	4	6	0	4	4	10	5	5	14	0	16	19	14	8	71
'Arm/hand','Leg','Low back','Other'		Other	4	4	218	7	'Other'		2	8	5	10	0	3	0	0	6	5	2	3	7	3	0	8	0	5	25	3	20	21	8	4	81
'Buttocks','foot','Genitals','Leg','Low back','Toes'		Toes	6	3	39	42	'None'		10	10	10	0	5	5	7	3	10	1	5	5	5	7	10	10	10	10	30	20	19	42	20	6	137
'Abdomen','Buttocks','foot','Genitals','Leg','Low back','Mid-back','Other','Toes'	pelvis	Leg	7	4	168	3	'Diabetes'		9	5	10	0	5	9	3	0	5	8	3	0	8	5	10	9	8	5	24	17	19	31	19	7	117
'Arm/hand','foot','Leg'		Foot	6	3	17	2	'Other'		10	3	0	0	0	0	0	4	4	0	2	5	4	4	0	9	3	8	13	4	23	23	9	6	78
'Abdomen','Arm/hand','Chest','Fingers','foot','Genitals','Head','Jaw','Leg','Low back','Mid-back','Shoulder','Toes','Upper back'		Leg	9	3	480	0	'Heart disease','High blood pressure','Liver disease'		7	6	10	10	0	3	0	1	5	1	6	2	8	8	7	4	7	8	33	4	21	36	11	9	114
'Abdomen','Arm/hand','Chest','Fingers','foot','Head','Jaw','Leg','Low back','Mid-back','Neck','Shoulder','Toes','Upper back'		Leg	5	2	24	0	'None'		5	3	8	0	0	0	0	1	3	1	4	5	0	0	10	5	0	10	16	1	20	13	15	5	70
'Low back'		Low back	7	3	36	1	'High blood pressure'		7	6	5	7	5	6	5	7	8	2	4	4	3	7	8	5	4	6	25	23	20	28	13	7	116
'Abdomen','foot','Leg','Low back','Mid-back','Other','Shoulder','Toes'		Low back	5	3	48	11	'Diabetes','Thyroid disease'		5	8	10	10	3	5	5	3	8	3	4	5	9	6	10	5	5	6	33	16	18	34	15	5	121
'Arm/hand','Buttocks','Fingers','foot','Head','Leg','Low back','Mid-back','Neck','Shoulder','Toes','Upper back'		Low back	7	4	52	12	'None'		10	10	10	10	10	10	10	10	10	1	1	1	9	9	10	2	5	8	40	40	27	41	12	7	167
'Buttocks','Fingers','Low back'		Low back	8	5	240	5	'None'		6	5	5	3	0	0	0	0	1	4	5	6	2	0	0	8	0	0	19	0	15	3	8	8	53
'Abdomen','Arm/hand','Chest','Face','Genitals','Leg','Low back','Mid-back','Neck'		Abdomen	9	4	7	10	'Diabetes','High blood pressure','Lung Disease','Thyroid disease'		7	5	10	0	10	4	5	4	10	0	1	0	8	7	10	2	10	10	22	23	29	45	12	9	140
'Arm/hand','Buttocks','Face','Fingers','foot','Head','Leg','Low back','Neck','Shoulder','Toes','Upper back'		Low back	5	3	24	4	'None'		5	8	10	8	5	4	1	3	10	6	4	5	8	8	10	7	10	8	31	13	15	44	17	5	125
'Arm/hand','Fingers','Head'		Arm/Hand	6	4	96	5	'High blood pressure','Other','Seizures'		0	7	0	0	3	2	0	1	8	2	2	5	9	9	10	6	2	9	7	6	21	37	16	6	93
'Arm/hand','Fingers','Low back'		Fingers	8	2	18	3	'None'		0	10	0	0	8	6	0	7	5	0	4	2	1	2	8	5	5	7	10	21	24	20	13	8	96
'Arm/hand','Buttocks','Chest','Fingers','foot','Head','Leg','Low back','Mid-back','Neck','Other','Shoulder','Upper back'		Leg	8	4	324	30	'Diabetes','High blood pressure','Liver disease'		10	10	10	10	7	7	10	3	10	1	1	1	10	9	10	0	10	5	40	27	27	44	10	8	156
'Buttocks','Leg','Low back'		Leg	6	3	36	6	'High blood pressure','Lung Disease'		10	3	10	10	0	0	0	0	3	3	6	5	5	2	7	5	1	2	33	0	16	13	12	6	80
'Arm/hand','Face','Fingers','foot','Genitals','Head','Leg','Low back','Mid-back','Shoulder','Toes'		Low back	9	6	48	6	'High blood pressure','Lung Disease'		10	9	10	10	0	6	6	2	10	0	0	0	4	5	6	4	10	10	39	14	30	39	10	9	141
'Arm/hand','Head','Leg','Low back','Neck','Upper back'		Low back	6	4	36	28	'Lung Disease'		8	6	4	1	2	2	5	3	10	4	7	2	4	2	8	6	10	8	19	12	17	34	14	6	102
'Buttocks','foot','Genitals','Head','Leg','Low back'		Low back	9	4	240	2	'High blood pressure','Other'		8	8	10	7	8	7	6	0	10	0	5	5	6	10	10	0	10	10	33	21	20	46	10	9	139
'Buttocks','Face','foot','Head','Leg','Low back','Neck','Shoulder','Upper back'		Low back	7	5	84	5	'High blood pressure','Other'		6	8	6	4	3	1	0	0	8	5	4	2	4	4	7	5	6	5	24	4	19	27	12	7	93
'Arm/hand','Buttocks','Fingers','foot','Leg','Low back'	VA disability	Low Back	6	3	36	1		Diabetes,neuropathy	5	7	4	2	3	5	4	4	9	7	2	3	7	9	8	0	7	10	18	16	18	42	8	6	108
'Abdomen','Arm/hand','Buttocks','Fingers','foot','Leg','Low back','Neck','Shoulder','Toes','Upper back'		Neck	5	2	384	6	'Diabetes','High blood pressure','Other'		5	3	2	4	0	0	4	0	6	2	2	3	4	3	7	7	7	5	14	4	23	25	14	5	85
'Arm/hand','Chest','Fingers','Head','Leg','Neck','Shoulder'		Neck	4	2	108	3			7	10	10	10	2	3	0	0	9	0	4	3	5	5	10	5	4	4	37	5	23	27	15	4	111
'Low back','Mid-back'		Low Back	74	3	17	1	'None'		6	5	5	5	3	3	0	0	6	3	5	0	5	0	8	5	0	5	21	6	22	16	13	74	152
'Arm/hand','Fingers','Shoulder'		Shoulder	8	5	20	10	'Other'	High cholesterol	0	0	0	0	5	7	0	0	9	0	4	4	8	7	10	7	8	7	0	12	22	39	17	8	98
		Leg	0	0	11	11			1	1	1	1	1	1	1	1	1	1	1	1	1	1	1	1	1	1	4	4	27	5	2	0	42
'Arm/hand','Mid-back','Neck','Shoulder'		Low Back	74	0	50	3		migrains	5	8	7	10	1	4	0	3	8	3	4	5	5	3	5	4	7	5	30	8	18	28	9	74	167
'Abdomen','Buttocks','Face','Fingers','foot','Head','Jaw','Leg','Low back','Mid-back','Neck','Shoulder','Toes','Upper back'	knees	Low Back	6	4	252	21	'Heart disease','High blood pressure','Lung Disease'	Migraines, IBS, Radiculopathy, CRPS	8	8	9	8	5	6	7	4	10	2	0	1	10	10	10	4	7	10	33	22	27	47	14	6	149
'Arm/hand','foot','Low back','Toes'		Low Back	8	5	360	4			7	7	10	10	7	2	3	3	10	3	3	4	3	8	8	2	7	8	34	15	20	36	10	8	123
'Leg'		Leg	10	5	2	60			10	10	10	10	5	5	5	0	5	3	5	7	0	0	3	10	0	0	40	15	15	5	13	10	98
'Low back','Mid-back','Neck','Shoulder'		Low Back	74	5	16	1		hearing loss in both ears loss most in left	8	10	10	10	10	10	10	10	10	0	1	1	6	6	8	7	10	6	38	40	28	38	15	74	233
'foot','Leg','Low back','Neck'		Neck	3	2	168	4		Hypertension,	4	10	10	5	0	0	0	0	10	5	5	5	0	0	10	5	0	5	29	0	15	15	15	3	77
'Arm/hand','Buttocks','Fingers','foot','Leg','Low back','Mid-back','Shoulder','Toes'		Low Back	9	2	60	2	'Diabetes','Heart disease','Seizures'	osteoarthiritus	10	3	5	10	1	1	1	0	0	5	1	0	7	0	3	0	0	5	28	3	24	12	3	9	79
'Low back'		Low Back	5	5	480	4	'None'		2	6	5	0	1	2	1	1	3	6	6	8	1	2	2	9	2	5	13	5	10	13	11	5	57
'Low back'		Low Back	5	5	529	3	'High blood pressure'		9	9	10	10	5	2	0	2	3	4	4	5	0	2	7	0	2	5	38	9	17	12	7	5	88
'Leg','Low back'		Low Back	8	5	480	2	'None'		9	9	9	10	7	7	0	5	0	7	2	5	0	0	0	0	5	5	37	19	16	10	0	8	90
'Low back'		Low Back	4	0	456	1	'High blood pressure'		5	5	10	1	4	4	4	4	4	4	4	5	3	3	2	4	5	4	21	16	17	19	6	4	83
'Arm/hand','Buttocks','Fingers','foot','Head','Leg','Low back','Mid-back','Neck','Shoulder','Toes','Upper back'		Low Back	9	6	444	9	'Heart disease','High blood pressure','Seizures'	A-fibs, Asthma,Allergies. Thyroid Removed	9	9	8	10	1	6	4	8	5	5	5	3	7	7	8	6	7	8	36	19	17	34	14	9	129
'Abdomen','Arm/hand','Buttocks','Fingers','foot','Head','Jaw','Leg','Low back','Mid-back','Neck','Shoulder','Toes','Upper back'		Mid Back	8	4	456	3	'High blood pressure'	Fibromyalgia, Chronic Fatigue Syndrome	10	10	10	0	5	5	0	8	6	1	1	2	2	0	0	8	1	2	30	18	26	11	8	8	101
'Abdomen','Arm/hand','Fingers','foot','Leg','Low back','Mid-back','Other','Shoulder','Toes'	Knee, Ankle, Hip	Other	8	5	456	4	'None'		10	9	8	9	1	1	1	3	9	2	0	5	8	4	10	7	1	1	36	6	23	23	17	8	113
'Arm/hand','Buttocks','Fingers','Head','Leg','Low back','Neck','Other','Shoulder','Toes'	Elbows and Knees	Butocks	6	2	348	1	'High blood pressure'		10	10	0	0	0	0	0	0	9	5	4	7	4	6	10	7	8	10	20	0	14	37	17	6	94
'Low back','Shoulder'		Shoulder	5	3	34	5	'Cancer','Heart disease','High blood pressure','Other','Thyroid disease'	removed 3 skin cancers, bladder cancer almost 5 years ago, atrial fibrillation,	7	10	5	10	10	7	0	8	7	6	8	7	1	2	8	4	0	6	32	25	9	16	12	5	99
'Abdomen','Arm/hand','Buttocks','Face','Fingers','foot','Head','Jaw','Leg','Low back','Mid-back','Neck','Other','Shoulder','Toes','Upper back'	Complex Regional Pain Syn	Other	8	6	109	11	'Thyroid disease'	migraines, osteoporosis, charcot-marie-tooth, asthma, cushing's disease,	7	7	6	6	8	6	5	7	10	4	3	4	7	8	3	8	9	9	26	26	19	43	11	8	133
'Arm/hand','Face','Fingers','foot','Head','Jaw','Leg','Low back','Mid-back','Neck','Shoulder','Toes','Upper back'		Neck	7	5	24	8	'Other'	Sleep apnea and Fibromyalgia	8	8	5	0	0	0	0	0	10	2	5	6	7	4	3	8	10	5	21	0	17	36	11	7	92
'Arm/hand','Leg','Low back','Mid-back','Neck','Shoulder','Toes'		Leg	8	6	36	2	'Diabetes','Other'	posthypnotic in left eye	9	6	9	8	5	4	3	1	2	7	5	6	0	0	8	8	3	2	32	13	12	7	16	8	88
'Abdomen','Buttocks','Chest','Fingers','foot','Head','Leg','Low back','Mid-back','Neck','Shoulder','Toes','Upper back'		Mid Back	7	1	252	12	'High blood pressure','Seizures'	dysplatic nevih syndrome	10	8	10	10	10	10	10	8	10	5	2	2	10	10	10	10	10	10	38	38	21	50	20	7	174
'Arm/hand'		Arm/Hand	8	4	552	1	'High blood pressure'		10	7	10	10	6	6	5	2	3	2	7	6	3	6	4	8	3	6	37	19	15	21	12	8	112
'Abdomen','Face','Fingers','foot','Head','Leg','Low back','Mid-back','Neck','Shoulder','Toes'		Low Back	10	4	14	6	'None'		10	9	10	9	9	10	4	2	7	2	4	4	0	2	8	2	4	4	38	25	20	17	10	10	120
'Low back','Mid-back','Neck','Upper back'		Mid Back	5	3	24	3		depression/bi polar	2	6	0	1	8	6	6	6	8	0	2	2	2	3	10	2	8	10	9	26	26	31	12	5	109
'Abdomen','Arm/hand','Buttocks','Chest','Face','Fingers','foot','Head','Jaw','Leg','Low back','Mid-back','Neck','Other','Shoulder','Toes','Upper back'	knees/calves	Low Back	8	5	324	3		Asthma/chronic fatigue	7	10	8	4	0	3	0	2	9	0	0	2	8	10	6	6	8	10	29	5	28	45	12	8	127
'Abdomen','Arm/hand','Buttocks','Chest','Fingers','foot','Head','Jaw','Leg','Low back','Mid-back','Neck','Shoulder','Toes','Upper back'		Foot	8	5	398	3	'None'		3	3	3	1	0	0	0	0	8	5	4	5	6	6	8	5	0	8	10	0	16	28	13	8	75
'Leg'	lower l leg	Leg	4	3	156	2		obesity	10	10	10	10	10	10	10	10	8	0	3	4	3	5	5	5	5	7	40	40	23	28	10	4	145
'Abdomen','Arm/hand','Chest','Fingers','foot','Head','Leg','Low back','Mid-back','Neck','Shoulder','Toes','Upper back'	none	Arm/Hand	10	3	24	3	'None'	none	6	10	6	0	10	7	7	10	10	0	0	0	10	10	10	4	10	10	22	34	30	50	14	10	160
'Abdomen','Arm/hand','Buttocks','Fingers','foot','Leg','Low back','Mid-back','Neck','Shoulder','Toes','Upper back'		Foot	6	4	263	3	'Diabetes','High blood pressure'		7	4	9	0	3	5	3	4	7	10	3	3	10	10	6	4	7	7	20	15	14	41	10	6	106
'Buttocks','foot','Leg','Low back','Mid-back','Neck','Other','Shoulder','Toes','Upper back'	hip/femur/knee	Leg	8	4	169	16	'High blood pressure'		9	8	10	10	5	7	7	8	8	3	4	3	8	8	10	7	10	7	37	27	20	41	17	8	150
'Abdomen','Arm/hand','Buttocks','Fingers','Genitals','Head','Leg','Low back','Mid-back','Neck','Shoulder','Toes','Upper back'		Abdomen	6	3	170	15		fibromyalgia	7	10	6	0	5	3	3	8	7	3	5	5	6	5	5	7	6	8	23	19	17	32	12	6	109
'Arm/hand','Head','Jaw','Mid-back','Neck','Upper back'		Head	9	3	516	5	'Lung Disease'	blood clots genetic predisposition	8	1	8	0	0	0	0	0	10	4	0	2	5	9	0	9	10	10	17	0	24	44	9	9	103
'Abdomen','Arm/hand','Buttocks','Chest','Fingers','foot','Head','Leg','Low back','Mid-back','Neck','Shoulder','Toes','Upper back'		Leg	9	4	17	4	'Heart disease','Kidney disease'		10	10	10	10	8	2	5	5	1	0	3	5	4	2	0	3	5	0	40	20	22	12	3	9	106
'Arm/hand','Head','Leg','Low back','Mid-back','Neck','Shoulder','Upper back'		Neck	6	3	72	13	'Other'	Asthma and allergies	5	7	5	0	6	5	4	4	5	3	5	4	7	2	9	8	6	10	17	19	18	30	17	6	107
'Head','Leg','Low back','Shoulder'		Leg	6	0	21	24	'None'		8	6	10	0	5	5	5	2	10	2	5	4	10	10	10	5	10	10	24	17	19	50	15	6	131
'Arm/hand','Buttocks','Fingers','Jaw','Leg','Low back','Neck'		Low Back	2	2	36	10	'Other'	copd/ fibromyalgia	8	10	10	1	6	0	0	3	2	2	2	2	4	0	6	6	6	4	29	9	24	16	12	2	92
'foot','Leg'		Leg	7	3	24	30			10	7	10	3	0	0	0	0	7	4	7	3	7	5	4	4	7	4	30	0	16	30	8	7	91
'Arm/hand','Buttocks','Chest','Fingers','Head','Jaw','Low back','Mid-back','Neck','Shoulder','Upper back'		Shoulder	7	5	168	10	'High blood pressure'		4	10	10	3	10	7	5	10	10	1	4	0	3	7	10	3	4	3	27	32	25	27	13	7	131
'Arm/hand','Buttocks','Fingers','foot','Leg','Low back','Mid-back','Neck','Shoulder','Toes','Upper back'		Low Back	8	4	264	7	'Diabetes','High blood pressure'		8	2	5	1	10	1	1	3	4	3	3	1	5	4	8	7	9	6	16	15	23	28	15	8	105
'Abdomen','Buttocks','Chest','Face','foot','Genitals','Head','Jaw','Leg','Low back','Mid-back','Neck'		Low Back	6	1	65	10	'None'	osteoporosis, raynaudus, hypothyroidism	4	7	3	2	5	1	1	4	3	2	5	3	3	3	5	5	3	6	16	11	20	18	10	6	81
'Abdomen','Arm/hand','Chest','Fingers','foot','Head','Jaw','Leg','Low back','Mid-back','Neck','Toes','Upper back'		Foot	6	3	10	12	'High blood pressure'	Lupus, Polyneuropathy,	10	8	9	10	10	7	4	7	10	5	5	7	5	5	7	8	0	5	37	28	13	25	15	6	124
'Arm/hand','Fingers','foot','Leg','Low back','Mid-back','Neck','Shoulder','Toes','Upper back'		Low Back	5	3	24	0	'Heart disease','High blood pressure','Kidney disease','Lung Disease'		10	10	10	9	10	10	10	10	4	0	2	4	1	0	4	1	3	3	39	40	24	11	5	5	124
'Abdomen','Arm/hand','Chest','Face','Fingers','foot','Genitals','Head','Jaw','Leg','Low back','Mid-back','Neck','Shoulder','Upper back'		Arm/Hand	6	3	72	72	'Diabetes'		6	10	6	0	5	5	6	5	9	5	3	4	6	5	10	5	7	7	22	21	18	34	15	6	116
'Abdomen','Arm/hand','Buttocks','Fingers','foot','Head','Jaw','Leg','Low back','Mid-back','Neck','Shoulder','Upper back'		Low Back	6	4	480	4	'None'	IBS, fibromalgia, chronic faigue, osteoarthritis knees/back	5	2	7	2	0	0	0	0	5	2	4	0	3	0	10	6	6	10	16	0	24	24	16	6	86
'Arm/hand','Buttocks','Chest','Face','Fingers','foot','Genitals','Head','Leg','Low back','Mid-back','Neck','Shoulder','Toes','Upper back'		Leg	9	4	456	36	'Heart disease','High blood pressure','Lung Disease'	Black Lung Disease	9	9	10	7	2	8	7	2	3	5	5	4	6	2	9	4	3	5	35	19	16	19	13	9	111
'Arm/hand','Fingers','foot','Head','Leg','Low back','Mid-back','Neck','Shoulder','Toes','Upper back'		Leg	8	6	400	1	'Heart disease','Lung Disease'	Asthma and chronic bronchitis	10	10	10	10	8	1	0	1	0	7	8	7	0	0	1	8	0	2	40	10	8	2	9	8	77
'Low back'		Low Back	4	4	216	3			6	7	8	5	5	8	5	5	8	1	1	5	3	2	10	4	10	8	26	23	23	31	14	4	121
'Abdomen','Low back','Neck'		Abdomen	9	4	72	40	'Other'		7	7	6	0	5	0	0	3	10	2	3	3	3	0	0	4	8	8	20	8	22	29	4	9	92
'Arm/hand','Fingers','foot','Head','Leg','Low back','Mid-back','Neck','Other','Shoulder','Toes','Upper back'	hips	Neck	8	6	132	1	'Other'	Obsese	7	8	7	0	0	0	0	0	8	2	0	3	5	7	7	10	7	8	22	0	25	35	17	8	107

## Sheet: tbl_poq_Followup
average_pain	walk_ability	carry_ability	climb_stairs	require_wheelchair	bathing_ability	dressing_ability	bathroom_ability	grooming_ability	self_esteem	physical_activity	energy_level	strength_endurance	depression	anxiety	reinjury_worry	exercise	concentrating	tense	overall_treatment	recommend	mobility_total	adl_total	vitality_total	na_total	fear_total	pain_total	total_score
5	8	8	8	8	6	8	6	0	5	0	2	4	3	0	7	3	5	4	3	3	32	20	24	17	10	5	108
4	6	3	8	2	0	0	0	0	4	6	4	4	1	2	6	6	7	4	7	8	19	0	16	18	12	4	69
9	4	1	4	0	1	1	0	1	9	6	3	4	1	1	2	6	0	8			9	3	17	19	8	9	65
6	5	6	7	0	0	0	0	0	10	2	3	1	8	7	7	4	7	7	6	6	18	0	24	39	11	6	98
5	0	0	0	10	0	0	0	0	3	6	7	7	2	2	3	2	3	6	10	10	10	0	10	16	5	5	46
5	6	6	5	0	5	3	1	6	8	3	3	3	8	7	7	6	8	7	8	10	17	15	21	38	13	5	109
6	3	5	7	3	0	2	0	0	7	5	5	5	4	0	2	8	5	3	10	10	18	2	15	19	10	6	70
5	5	4	8	0	0	0	0	2	5	5	4	5	5	1	3	8	7	5	10	10	17	2	16	23	11	5	74
5	3	6	5	0	5	5	5	5	6	6	5	6	7	7	7	5	2	5	9	10	14	20	13	27	12	5	91
5	10	10	6	0	0	0	0	0	8	4	5	4	2	4	9	5	4	4	10	10	26	0	17	22	14	5	84
9	10	5	10	10	7	7	8	0	10	6	6	6	6	8	5	6	10	7	10	10	35	22	12	41	11	9	130
4	0	1	0	2	0	0	0	0	1	6	6	5	1	5	1	9	2	5	10	10	3	0	13	14	10	4	44
3	1	0	3	0	1	1	1	0	1	5	7	6	0	0	1	10	1	2	10	10	4	3	12	4	11	3	37
6	0	0	0	0	0	0	0	0	7	3	3	5	7	7	6	5	5	7	10	10	0	0	19	33	11	6	69
8	8	10	8	0	5	2	2	5	6	5	4	3	6	7	2	8	7	9	8	10	26	14	18	35	10	8	111
7	3	5	3	6	1	1	0	4	5	4	4	0	0	2	3	9	8	6	8	10	17	6	22	21	12	7	85
8	5	8	5	0	2	0	0	4	5	5	3	3	5	2	0	10	5	7	10	10	18	6	19	24	10	8	85
4	0	0	1	0	0	0	0	0	1	7	7	8	4	6	6	10	4	7	10	10	1	0	8	22	16	4	51
7	0	0	0	0	0	0	0	0	4	7	6	6	2	2	3	8	0	4	10	10	0	0	11	12	11	7	41
4	3	3	4	2	0	0	0	3	4	7	5	6	4	7	8	8	8	6	10	10	12	3	12	29	16	4	76
6	2	10	5	0	0	2	5	0	5	5	5	1	3	2	3	8	3	7	9	9	17	7	19	20	11	6	80
8	6	8	9	1	2	2	2	2	2	6	1	2	9	9	9	2	9	9	10	10	24	8	21	38	11	8	110
5	5	2	2	1	0	0	3	2	6	8	7	7	1	1	2	6	0	3			10	5	8	11	8	5	47
7	0	10	0	0	1	0	0	1	5	1	2	0	10	10	10	0	10	4	10	10	10	2	27	39	10	7	95
4	1	2	1	0	1	1	0	1	2	4	4	3	1	0	3	8	1	2	10	10	4	3	19	6	11	4	47
6	0	10	0	0	5	5	4	0	0	5	5	5	0	0	5	8	5	4	10	10	10	14	15	9	13	6	67
3	0	1	0	0	0	0	0	0	2	6	9	9	2	1	3	8	1	4	9	10	1	0	6	10	11	3	31
5	2	10	10	0	1	2	0	2	5	4	6	2	2	0	7	5	7	1	8	10	22	5	18	15	12	5	77
4	0	6	0	1	1	1	0	0	1	8	6	8	0	3	5	10	0	6	10	10	7	2	8	10	15	4	46
4	7	6	5	0	7	5	0	5	8	6	6	4	0	3	7	6	0	4	10	10	18	17	14	15	13	4	81
8	10	4	10	6	1	2	0	2	2	9	2	9	5	5	8	9	10	8	9	10	30	5	10	30	17	8	100
8	10	10	10	10	10	10	10	9	0	0	1	3	0	0	5	2	0	10	10	10	40	39	26	10	7	8	130
6	1	2	1	0	0	0	4	0	7	6	6	7	5	5	7	4	5	7			4	4	11	29	11	6	65
2	5	0	5	0	0	0	0	0	5	6		8	0	2	4	8	0	5	10	10	10	0		12	12	2
4	0	0	0	0	0	0	0	0	2	5	6	6	2	0	6	8	0	2	8	9	0	0	13	6	14	4	37
10	0	10	1	0	0	5	0	4	7	3	3	3	7	7	5	5	8	10	10	10	11	9	21	39	10	10	100
8	5	6	7	0	0	3	0	0	0	5	6	6	0	2	7	10	5	5	10	10	18	3	13	12	17	8	71
5	5	8	8	0	3	3	2	5	5	4	5	5	2	2	10	8	5	5	8	10	21	13	16	19	18	5	92
6	3	2	0	0	3	3	3	0	4	7	4	5	8	8	7	5	4	8	10	10	5	9	14	32	12	6	78
5	6	6	9	0	3	2	0	0	10	9	5	6	8	0	1	5	5	1	10	10	21	5	10	24	6	5	71
4	5	5	5	0	8	5	1	3	2	4	5	6	1	1	2	6	2	5	5	6	15	17	15	11	8	4	70
5	4	3	2	0	0	1	0	0	5	7	6	6	7	7	6	8	6	7	8	10	9	1	11	32	14	5	72
6	7	3	4	0	0	5	2	0	7	5	4	7	2	6	5	7	2	9	9		14	7	14	26	12	6	79
5	0	7	0	0	3	0	5	0	8	1	0	2	8	5	8	1	7	6	8	10	7	8	27	34	9	5	90
3	4	1	2	0	1	1	0	1	1	9	7	7	1	2	0	9	0	7	10	10	7	3	7	11	9	3	40
4	5	5	0	0	0	0	0	0	3	6	5	3	7	2	1	8	8	4	8	10	10	0	16	24	9	4	63
5	5	0	6	0	0	0	5	1	3	5	6	6	0	0	4	6	5	3	10	10	11	6	13	11	10	5	56
8	8	8	8	5	8	8	8	6	6	2	6	5	2	0	3	5	5	9	10	8	29	30	17	22	8	8	114
4	3	2	0	0	0	0	0	0	4	3	5	7	0	2	1	10	0	3	8	10	5	0	15	9	11	4	44
4	5	10	10	5	0	5	5	5	8	5	5	8	0	5	0	5	10	5	10	10	30	15	12	28	5	4	94
4	3	6	3	0	5	5	2	0	7	6	5	5	3	5	9	10	5	4	10	10	12	12	14	24	19	4	85
4	5	5	4	3	4	2	0	3	4	4	2	2	6	5	4	4	7	5	10	10	17	9	22	27	8	4	87
4	10	10	7	0	3	4	0	0	4	5	5	5	5	6	10	10	8	5	10	10	27	7	15	28	20	4	101
1	2	1	1	2	2	1	1	1	1	2	1	1	1	2	1	1	1	1	2	1	6	5	26	6	2	1	46
5	7	8	8	7	5	5	9	3	5	4	5	3	2	1	0	10	0	4	10	10	30	22	18	12	10	5	97
4	3	3	1	0	0	0	1	0	0	5	7	5	0	2	7	9	6	4	10	10	7	1	13	12	16	4	53
1	3	6	0	0	0	0	0	0	5	7	7	7	1	3	5	9	0	5	10	10	9	0	9	14	14	1	47
5	6	7	8	0	0	3	0	0	2	7	8	8	0	0	2	10	0	4	10	10	21	3	7	6	12	5	54
6	8	8	10	2	4	3	2	1	4	4	5	4	0	0	8	8	6	2	10	10	28	10	17	12	16	6	89
4	0	0	0	0	0	0	0	0	1	8	7	8	1	1	2	10	1	1	10	10	0	0	7	5	12	4	28
2	0	5	0	0	0	2	0	0	3	5	9	7	0	5	2	10	4	2	10	10	5	2	9	14	12	2	44
3	0	3	0	0	0	0	0	0	2	9	7	5	0	2	7	10	3	3	10	10	3	0	9	10	17	3	42
8	4	4	4	0	0	0	0	4	10	2	4	3	5	7	10	8	10	7	10	10	12	4	21	39	18	8	102
6	3	0	1	0	0	0	0	0	6	3	2	6	4	1	7	5	7	3	10	10	4	0	19	21	12	6	62
6	0	5	3	0	0	0	0	0	5	5	5	4	4	0	2	8	5	8	10	10	8	0	16	22	10	6	62
3	0	0	0	0	0	0	0	0	1	8	7	7	2	2	2	9	2	5	9	10	0	0	8	12	11	3	34
5	1	0	1	0	0	1	0	0	1	6	7	7	0	0	2	9	3	5	7	7	2	1	10	9	11	5	38
8	10	10	10	10	5	5	0	0	10	5	0	0	4	4	5	5	3	5	10	10	40	10	25	26	10	8	119
6	0	0	6	0	0	4	0	4	4	5	5	5	0	0	0	5	5	1	10	10	6	8	15	10	5	6	50
3	6	6	4	0	0	0	0	0	5	4	7	8	0	0	0	7	2	3	10	10	16	0	11	10	7	3	47
5	1	2	0	0	1	0	0	6	2	5	4	5	0	1	0	0	0	8	10	10	3	7	16	11	0	5	42
4	4	3	5	5	3	3	0	0	6	5	3	7	5	4	10	5	5	10	10	10	17	6	15	30	15	4	87
4	0	0	0	0	0	0	0	0	0	9	10	10	0	1	0	10	0	2	10	10	0	0	1	3	10	4	18
9	9	0	2	0	0	0	0	0	0	5	6	4	0	5	4	4	0	5	5	8	11	0	15	10	8	9	53
4	9	8	8	7	4	10	0	4	5	5	2	3	9	5	10	3	5	5	9	10	32	18	20	29	13	4	116
7	0	6	0	0	2	0	0	0	5	5	4	5	6	4	7	3	5	8	10	10	6	2	16	28	10	7	69
3	0	1	0	0	0	0	0	0	0	7	8	8	0	0	2	10	0	2	10	10	1	0	7	2	12	3	25
5	7	8	9	2	2	3	2	3	2	3	2	2	0	3	2	2	9	2	10	10	26	10	23	16	4	5	84
3	0	0	0	0	0	0	0	0	0	6	6	6	0	0	8	3	0	5	10	10	0	0	12	5	11	3	31
8	8	10	10	10	8	8	7	7	8	5	5	8	5	5	10	7	8	8	10	10	38	30	12	34	17	8	139
6	6	4	4	5	2	2	0	0	0	5	8	9	0	2	2	10	6	4	10	10	19	4	8	12	12	6	61
2	0	0	0	0	0	0	0	0	0	8	9	8	0	3	6	9	3	3	10	10	0	0	5	9	15	2	31
7	9	10	10	10	9	9	5	6	10	3	3	3	6	9	10	0	10	9	7	10	39	29	21	44	10	7	150
8	5	5	10	0	5	6	0	5	8	4	4	4	0	5	10	5	2	10	10	10	20	16	18	25	15	8	102
7	7	7	6	2	1	0	3	0	2	4	5	1	1	3	2	10	7	3	8	10	22	4	20	16	12	7	81
7	10	10	10	10	1	6	1	1	10	3	4	2	10	8	8	4	4	4	8	10	40	9	21	36	12	7	125
8	10	10	10	0	9	9	9	9	0	5	3	3	5	8	2	10	1	6	10	7	30	36	19	20	12	8	125
5	5	0	3	0	6	4	2	6	5	8	5	8	3	3	6	4	9	8	9	10	8	18	9	28	10	5	78
4	5	3	5	0	0	1	0	0	3	6	6	7	2	3	5	8	4	2	10	10	13	1	11	14	13	4	56
5	5	8	5	0	3	3	0	3	8	5	3	3	2	2	0	10	8	4	10	10	18	9	19	24	10	5	85
2	0	1	0	0	0	0	0	0	1	5	6	7	1	8	7	5	6	8	10	10	1	0	12	24	12	2	51
2	0	1	0	0	2	2	8	4	0	6	5	6	3	1	8	4	10	3	7	10	1	16	13	17	12	2	61
3	1	2	2	0	0	0	0	0	0	7	9	7	2	4	3	7	1	3	10	10	5	0	7	10	10	3	35
7	7	8	9	10	5	5	0	0	6	6	5	5	7	5	4	8	1	5	10	10	34	10	14	24	12	7	101
6	6	8	3	10	4	1	4	2	10	6	2	2	8	6	4	3	8	10	5	7	27	11	20	42	7	6	113
5	2	1	1	0	3	3	0	1	3	5	4	4	3	3	10	10	5	5	10	10	4	7	17	19	20	5	72
10	3	9	5	0	4	0	2	5	10	4	4	2	5	4	7	3	0	5	10	10	17	11	20	24	10	10	92
7	6	8	9	3	6	7	6	3	8	5	5	3	8	8	7	5	10	10	10	10	26	22	17	44	12	7	128
7	7	7	6	0	3	3	1	0	7	7	7	8	4	6	0	10	6	5	10	10	20	7	8	28	10	7	80
8	8	10	10	5	5	5	0	10	10	5	5	5	7	8	9	0	7	7	10	9	33	20	15	39	9	8	124
6	4	8	3	7	2	1	0	0	4	4	5	4	5	3	8	5	0	7	10	10	22	3	17	19	13	6	80
8	10	10	10	10	10	10	10	10	0	0	3	0	4	8	3	3	1	8	9	10	40	40	27	21	6	8	142
6	5	8	8	7	0	2	0	0	5	5	4	6	1	2	3	5	2	4	7	8	28	2	15	14	8	6	73
5	7	9	6	0	6	4	2	0	6	7	5	5	7	7	7	6	3	7	9	10	22	12	13	30	13	5	95
2	5	6	10	10	2	1	1	2	2	5	5	5	2	2	2	8	5	2	9	10	31	6	15	13	10	2	77
8	5	6	8	7	4	2	0	2	8	5	4	3	3	1	5	7	0	7	9	10	26	8	18	19	12	8	91
5	10	10	10	10	5	10	5	7	6	2	1	3	9	0	7	8	2	0	7	10	40	27	24	17	15	5	128
6	5	7	8	0	5	5	3	7	4	6	7	6	2	5	4	8	4	4	10	10	20	20	11	19	12	6	88
6	6	3	6	0	0	2	2	2	4	5	6	6	5	2	0	8	8	2	8	10	15	6	13	21	8	6	69
5	0	7	0	0	0	0	0	0	1	5	8	6	0	3	5	7	1	8	8	10	7	0	11	13	12	5	48
4	4	5	7	0	7	4	8	0	8	2	0	0	6	8	10	0	5	10	10	10	16	19	28	37	10	4	114
2	3	2	1	0	0	2	0	0	3	5	7	6	2	0	8	7	1	3	10	10	6	2	12	9	15	2	46
2	0	0	0	0	0	2	0	0	0	5	4	5	0	1	2	9	5	2	9	10	0	2	16	8	11	2	39
4	0	0	3	0	0	0	0	0	0	8	7	8	0	0	0	9	0	3	8	8	3	0	7	3	9	4	26
5	5	3	3	0	0	0	0	2	10	1	1	2	9	4	1	6	10	8	10	10	11	2	26	41	7	5	92
5	5	6	4	3	0	0	0	0	0	8	3	5	0	0	0	5	0	0	10	10	18	0	14	0	5	5	42
6	10	0	8	10	0	0	0	0	7	6	5	6	5	5	8	5	0	5	10	10	28	0	13	22	13	6	82
7	7	8	7	8	6	6	7	6	7	5	3	3	6	5	6	2	4	7	9	9	30	25	19	29	8	7	118
2	1	2	2	0	0	0	0	0	3	6	7	7	2	2	5	7	0	9		9	5	0	10	16	12	2	45
6	2	5	2	2	3	3	1	3	3	3	5	5	4	4	6	5	3	5	9	9	11	10	17	19	11	6	74
6	2	0	5	0	3	2	0	0	5	4	2	3	4	2	5	10	5	8	10	0	7	5	21	24	15	6	78
4	2	6	1	0	0	0	0	0	2	4	5	6	2	1	6	7	2	3	4	4	9	0	15	10	13	4	51
2	2	8	2	0	2	2	0	4	4	5	6	6	7	6	10	8	10	8	10	10	12	8	13	35	18	2	88
7	5	5	8	0	3	3	3	3	8	8	2	7	7	7	6	7	7	7	10	10	18	12	13	36	13	7	99
5	10	8	10	7	3	0	0	0	0	2	5	3	3	1	10	3	4	5	10	10	35	3	20	13	13	5	89
7	0	3	2	5	2	2	2	1	0	6	7	9	3	1	0	5	5	3	10	10	10	7	8	12	5	7	49
1	0	0	0	0	0	1	0	0	1	8	9	8	0	1	7	9	0	2	10	10	0	1	5	4	16	1	27
4	0	2	1	0	0	0	0	0	0	5	6	5	0	2	2	10	4	2	10	10	3	0	14	8	12	4	41
3	0	7	7	0	3	0	0	2	4	5	6	6	1	5	6	7	6	6	10	10	14	5	13	22	13	3	70
9	10	10	10	10	8	8	10	8	7	0	2	0	0	5	7	0	10	8	8	10	40	34	28	30	7	9	148
7	10	7	5	8	2	7	3	1	9	2	0	2	2	2	3	10	3	9	9	10	30	13	26	25	13	7	114
4	1	1	0	0	0	0	0	0	3	5	3	1	5	2	5	7	3	8	8	8	2	0	21	21	12	4	60
5	0	0	0	0	0	0	0	0	1	1	5	2	5	0	6	1	1	1	8	10	0	0	22	8	7	5	42
3	1	2	0	0	0	1	0	0	4	5	7	5	5	8	8	8	8	8	8	10	3	1	13	33	16	3	69
8	5	6	4	0	3	2	0	0	4	4	4	5	2	3	5	5	6	8	10	10	15	5	17	23	10	8	78
3	1	7	3	1	4	4	4	4	8	6	4	2	5	5	7	5	4	5	8	8	12	16	18	27	12	3	88
4	3	3	2	0	1	0	0	0	6	7	5	5	5	5	2	2	8	5	8	8	8	1	13	29	4	4	59
5	2	3	3	0	5	4	4	4	0	7	7	7	5	6	8	7	7	8	10	10	8	17	9	26	15	5	80
3	3	5	5	0	1	1	1	1	4	4	4	4	4	7	4	10	1	4	10	10	13	4	18	20	14	3	72
7	2	7	9	0	9	5	3	2	3	4	6	6	0	3	2	9	0	3	9	10	18	19	14	9	11	7	78
6	5	6	4	0	3	3	3	0	8	6	4	4	5	5	6	10	6	10	9	10	15	9	16	34	16	6	96
9	2	0	0	0	0	0	0	0	8	7	5	6	7	6	6	6	8	7	10	10	2	0	12	36	12	9	71
7	9	3	8	10	0	0	0	0	4	2	7	6	2	0	0	10	0	6	9	9	30	0	15	12	10	7	74
4	4	9	4	3	2	3	8	1	4	3	3	4	3	0	10	6	3	0	10	10	20	14	20	10	16	4	84
7	8	7	10	7	8	8	10	7	6	3	6	6	5	5	9	6	6	9	10	10	32	33	15	31	15	7	133
7	10	10	10	10	10	8	0	4	3	6	6	7	0	3	0	10	7	7	10	10	40	22	11	20	10	7	110
8	10	6	10	9	5	4	7	2	6	4	2	4	7	7	8	4	8	8	10	10	35	18	20	36	12	8	129
5	0	3	2	0	0	0	0	0	2	5	5	3	0	4	0	9	5	5	10	10	5	0	17	16	9	5	52
7	6	6	8	10	3	3	3	3	8	9	5	3	6	6	8	3	5	8	10	10	30	12	13	33	11	7	106
2	10	1	10	10	0	0	0	0	1	8	8	7	0	0	2	8	0	2	9	10	31	0	7	3	10	2	53
5	2	0	0	0	4	3	0	0	2	8	5	6	1	3	0	9	3	6	10	10	2	7	11	15	9	5	49
5	6	0	0	0	0	0	0	0	3	5	8	7	2	2	5	8	5	3	8	10	6	0	10	15	13	5	49
6	8	8	8	8	7	7	7	7	5	3	4	3	4	4	8	7	5	3	10	10	32	28	20	21	15	6	122
3	0	0	2	0	0	0	0	0	0	8	8	8	2	4	6	9	2	5	10	10	2	0	6	13	15	3	39
6	6	5	6	0	2	2	2	2	3	3	4	4	2	2	8	3	2	2	9	9	17	8	19	11	11	6	72
3	2	4	0	0	0	0	0	0	7	5	3	1	8	8	10	7	8	8	10	10	6	0	21	39	17	3	86
4	5	3	10	0	1	1	8	0	8	5	4	8	2	1	10	10	1	7	10	10	18	10	13	19	20	4	84
9	5	5	7	4	0	0	0	0	2	2	5	5	0	1	0	10	5	5	7	10	21	0	18	13	10	9	71
5	6	2	4	0	0	0	0	0	2	6	6	7	1	4	0	8	2	9	10	10	12	0	11	18	8	5	54
7	8	9	10	1	10	10	7	5	5	2	3	2	3	3	8	2	7	5	9	10	28	32	23	23	10	7	123
7	6	4	8	5	3	3	1	0	6	3	4	5	7	9	3	5	9	10	6	7	23	7	18	41	8	7	104
5	0	10	7	10	7	3	0	4	6	0	4	4	4	8	10	0	10	10	8	10	27	14	22	38	10	5	116
7	5	7	5	0	7	7	5	5	5	7	6	5	0	0	8	9	0	5	10	10	17	24	12	10	17	7	87
3	0	0	3	0	0	0	0	1	0	4	4	4	0	2	3	6	6	4			3	1	18	12	9	3	46
8	6	7	10	10	3	3	2	3	0	4	1	2	0	0	5	5	5	10	10	10	33	11	23	15	10	8	100
5	10	10	10	10	10	10	5	5	3	0	3	0	0	2	2	1	0	3	10	10	40	30	27	8	3	5	113
6	4	9	8	1	1	3	1	1	2	4	3	4	7	8	10	5	10	10	10	10	22	6	19	37	15	6	105
4	10	10	10	10	4	4	5	0	10	3	5	4	7	7	10	5	7	10	7	10	40	13	18	41	15	4	131
7	10	10	10	10	5	5	5	2	5	4	4	4	4	5	7	5	5	5			40	17	18	24	12	7	118
8	10	10	9	8	8	10	8	8	10	0	2	1	10	10	5	4	5	8	6	6	37	34	27	43	9	8	158
8	4	10	4	0	5	5	10	5	4	5	4	4	4	5	10	3	5	5			18	25	17	23	13	8	104
1	0	0	0	0	0	0	0	0	2	3	4	4	3	3	2	8	2	3			0	0	19	13	10	1	43
7	10	7	10	9	9	9	0	0	9	2	3	3	5	7	7	4	10	8			36	18	22	39	11	7	133
10	10	10	10	10	10	10	7	4	7	0	5	3	6	7	5	5	7	8			40	31	22	35	10	10	148
6	10	10	10	0	5	10	10	6	10	0	5	1	5	1	5	1	10	5			30	31	24	31	6	6	128
5	2	0	6	0	3	3	1	0	5	3	4	4	2	2	7	7	2	4			8	7	19	15	14	5	68
4	4	2	6	0	0	0	0	3	4	4	7	7	8	7	7	7	5	8			12	3	12	32	14	4	77
6	0	7	0	0	2	2	0	0	4	3	7	7	3	5	10	6	10	6			7	4	13	28	16	6	74
6	0	0	5	0	0	0	0	3	8	6	6	0	5	7	7	10	0	4			5	3	18	24	17	6	73
6	7	3	8	0	0	3	0	0	0	7	7	6	0	0	5	7	7	0			18	3	10	7	12	6	56
6	10	10	10	8	10	8	8	10	0	5	5	5	5	5	10	7	6	7			38	36	15	23	17	6	135
3	8	0	7	0	0	0	0	0	5	2	2	5	4	1	0	8	2	3			15	0	21	15	8	3	62
5	7	3	8	8	10	2	0	1	5	5	7	5	4	7	3	7	6	8			26	13	13	30	10	5	97
6	5	6	10	6	5	5	5	3	8	5	2	4	0	4	10	9	8	5			27	18	19	25	19	6	114
8	10	10	10	9	10	10	10	10	10	0	2	3	10	5	9	2	6	9			39	40	25	40	11	8	163
7	9	9	10	0	5	5	5	5	8	2	3	1	7	8	7	4	10	9			28	20	24	42	11	7	132
7	4	9	10	6	5	3	3	9	10	5	5	6	8	6	8	6	10	10			29	20	14	44	14	7	128
8	0	10	0	0	8	8	5	8	8	0	4	8	8	10	10	5	10	7			10	29	18	43	15	8	123
8	10	9	10	10	6	8	10	6	10	3	2	0	10	10	10	7	10	9			39	30	25	49	17	8	168
3	2	0	8	1	0	0	0	0	0	6	6	5	0	0	5	9	2	0			11	0	13	2	14	3	43
9	10	8	10	10	6	5	4	4	7	0	2	0	4	8	10	10	10	9			38	19	28	38	20	9	152
7	3	7	4	0	3	3	3	0	4	5	7	5	6	3	10	6	5	8			14	9	13	26	16	7	85
7	8	10	10	3	0	4	3	3	10	3	0	2	1	10	10	5	8	10			31	10	25	39	15	7	127
9	8	5	7	3	5	5	5	5	10	3	2	2	10	10	9	8	8	8			23	20	23	46	17	9	138
4	7	7	5	2	3	3	0	0	4	3	3	3	3	4	7	4	5	5			21	6	21	21	11	4	84
1	1	1	1	1	0	1	1	1	1	1	0	1	4	4	5	5	5	5			4	3	28	19	10	1	65
6	0	7	0	6	5	5	0	4	3	5	5	5	2	2	5	8	6	3			13	14	15	16	13	6	77
5	5	6	6	8	4	5	5	5	10	2	0	2	5	7	8	4	10	10			25	19	26	42	12	5	129
7	10	8	9	9	10	10	9	8	8	4	4	4	5	1	1	7	9	1			36	37	18	24	8	7	130
1	0	0	0	0	0	0	0	0	0	5	10	5	0	0	0	10	0	0			0	0	10	0	10	1	21
6	2	6	4	0	0	0	0	0	2	7	7	7	1	2	1	8	5	4			12	0	9	14	9	6	50
2	2	10	0	10	0	0	0	0	0	4	4	4	0	0	0	5	0	1			22	0	18	1	5	2	48
7	7	10	8	10	7	7	5	0	6	7	6	4	0	0	10	7	4	3			35	19	13	13	17	7	104
8	8	9	7	10	1	6	1	7	8	6	6	7	5	8	10	7	7	4			34	15	11	32	17	8	117
7	10	8	10	4	3	3	3	5	0	2	2	2	3	1	2	4	9	1			32	14	24	14	6	7	97
7	9	9	8	9	6	6	7	7	8	1	1	7	7	8	9	1	7	8			35	26	21	38	10	7	137
4	0	5	1	9	5	3	0	3	2	4	6	8	0	3	2	7	0	4			15	11	12	9	9	4	60
8	5	6	8	3	8	8	6	8	6	4	4	4	5	6	1	8	5	7			22	30	18	29	9	8	116
5	8	9	3	0	0	1	1	0	2	5	5	4	0	1	6	5	2	5			20	2	16	10	11	5	64
7	7	9	5	2	5	0	0	0	0	5	4	6	2	2	4	5	0	3			23	5	15	7	9	7	66
6	0	10	0	0	5	4	0	4	10	3	5	5	2	3	2	5	1	7			10	13	17	23	7	6	76
2	8	5	8	4	6	6	2	1	9	2	4	4	0	4	8	6	2	6			25	15	20	21	14	2	97

## Sheet: tbl_poq_discharge
average_pain	walk_ability	carry_ability	climb_stairs	require_wheelchair	bathing_ability	dressing_ability	bathroom_ability	grooming_ability	self_esteem	physical_activity	energy_level	strength_endurance	depression	anxiety	reinjury_worry	exercise	concentrating	tense	overall_treatment	staff_warmth	staff_skills	ease_treatment	recommend	mobility_total	adl_total	vitality_total	na_total	fear_total	pain_total	total_score
5	7	7	7	7	7	7	6	6	6	4	3	3	5	5	5	4	5	5	10	10	10	10	10	28	26	20	26	9	5	114
2	0	0	7	0	0	0	0	0	5	4	4	4	0	0	3	8	3	3	9	10	9	9	10	7	0	18	11	11	2	49
1	2	3	3	0	0	0	0	0	0	5	6	5	0	0	0	5	5	3	10	10	10	10	10	8	0	14	8	5	1	36
7	3	3	1	0	0	1	0	0	6	2	2	2	4	1	2	3	2	5	7	10	10	9	10	7	1	24	18	5	7	62
7	6	7	6	0	0	0	3	0	6	2	2	3	0	4	6	6	6	6	7	10	10	9	9	19	3	23	22	12	7	86
4	10	0	0	0	0	0	0	0	0	7	8	8	0	0	3	8	0	5		10	10	10	10	10	0	7	5	11	4	37
4	2	2	3	1	4	5	2	7	7	4	2	2	6	6	7	7	8	3	9	10	10	9	10	8	18	22	30	14	4	96
1	0	0	0	0	0	0	0	0	0	8	9	9	0	1	0	10	1	1	10	10	10	10	10	0	0	4	3	10	1	18
7	3	3	5	0	0	5	0	0	0	7	7	7	0	4	2	10	3	2	10	10	10	10	10	11	5	9	9	12	7	53
4	2	6	4	0	0	0	0	1	5	7	6	5	2	6	0	8	4	6	10	10	7	10	10	12	1	12	23	8	4	60
7	8	0	0	0	0	0	0	0	4	5	8	5	1	1	8	8	1	5	10	10	10	10	10	8	0	12	12	16	7	55
6	10	2	10	10	2	3	0	2	10	4	5	5	4	7	0	0	10	5	10	10	10	10	10	32	7	16	36	0	6	97
7	8	5	6	3	0	1	1	0	0	3	10	8	1	5	0	10	6	5	10	10	10	10	10	22	2	9	17	10	7	67
3	0	0	0	0	1	0	2	1	1	5	5	6	2	5	0	10	5	5	10	10	10	10	10	0	4	14	18	10	3	49
2	1	1	4	0	1	1	0	0	1	9	7	2	0	0	2	10	0	1	10	10	9	10	10	6	2	12	2	12	2	36
8	9	7	10	0	8	3	1	2	9	3	5	3	9	10	10	1	4	7	10	10	10	10	10	26	14	19	39	11	8	117
1	0	1	0	0	0	0	0	0	1	10	7	9	0	0	2	10	0	0	10	10	10	10	10	1	0	4	1	12	1	19
6	4	10	6	2	1	1	0	1	4	5	3	3	3	0	4	7	6	6	10	10	10	10	10	22	3	19	19	11	6	80
2	0	5	0	0	0	0	0	0	3	6	7	5	0	0	8	4	7	4	10	10	10	10	10	5	0	12	14	12	2	45
8	6	8	7	0	4	4	2	5	5	5	5	3	3	6	4	8	7	8	9	10	9	10	9	21	15	17	29	12	8	102
4	4	1	4	0	0	0	0	0	4	6	6	5	5	5	1	10	5	5	10	10	10	10	10	9	0	13	24	11	4	61
2	3	0	3	5	0	0	0	0	3	5	5	6	1	1	2	10	4	1	10	10	10	10	10	11	0	14	10	12	2	49
5	6	7	7	0	5	8	0	0	6	5	3	5	5	5	0	10	5	5	8	10	10	10	10	20	13	17	26	10	5	91
2	0	0	0	0	0	0	0	0	0	9	9	6	5	8	0	10	0	5	10	10	10	10	10	0	0	6	18	10	2	36
3	0	0	0	0	0	0	0	0	0	10	8	8	3	4	0	10	0	0	10	10	10	10	10	0	0	4	7	10	3	24
6	6	1	1	0	0	0	0	0	3	8	7	8	2	3	3	8	2	3	9	10	9	10	10	8	0	7	13	11	6	45
5	3	5	0	0	0	0	0	0	3	7	6	8	0	3	0	8	3	6	10	10	10	10	10	8	0	9	15	8	5	45
4	3	4	6	0	4	1	2	2	1	9	4	6	2	2	2	7	1	1	9	10	10	10	10	13	9	11	7	9	4	53
4	0	8	0	0	3	5	10	3	0	5	3	5	0	0	5	5	2	0	10	10	10	10	10	8	21	17	2	10	4	62
4	0	1	0	0	1	1	0	1	1	5	5	6	0	0	0	10	0	0	10	10	10	10	10	1	3	14	1	10	4	33
3	0	2	0	0	1	1	0	1	2	8	8	9	1	2	4	8	1	5	10	10	10	10	10	2	3	5	11	12	3	36
4	0	5	0	0	3	5	0	5	2	5	3	5	0	0	4	4	0	2	9	10	10	10	10	5	13	17	4	8	4	51
7	3	6	3	0	0	2	0	2	0	9	7	9	2	1	3	9	2	2	10	10	10	10	10	12	4	5	7	12	7	47
3	2	5	1	0	0	0	0	0	1	5	4	3	0	0	4	9	0	2	10	10	9	10	10	8	0	18	3	13	3	45
8	10	8	10	10	9	6	6	7	4	4	2	0	1	5	0	8	10	5	10	10	10	10	10	38	28	24	25	8	8	131
7	10	10	10	8	10	10	10	10	5	3	3	7	0	1	5	5	9	5	10	10	10	10	10	38	40	17	20	10	7	132
10	3	8	0	7	0	0	0	0	5	10	3	10	0	7	2	10	0	5	10	10	10	10	10	18	0	7	17	12	10	64
7	2	4	0	0	0	0	2	0	5	7	8	8	3	4	3	9	1	6	10	10	10	10	10	6	2	7	19	12	7	53
4	5	5	0	0	3	3	0	2	7	7	6	4	2	2	7	4	8	7	8	10	8	10	10	10	8	13	26	11	4	72
4	0	3	0	0	0	0	0	0	3	8	8	8	1	1	4	10	2	4	9	9	9	8	9	3	0	6	11	14	4	38
6	0	9	9	0	1	2	1	4	5	5	5	5	3	5	6	7	7	7	10	10	10	10	8	18	8	15	27	13	6	87
7	3	7	2	0	4	4	2	5	4	4	5	5	5	4	2	5	6	7	10	10	10	10	10	12	15	16	26	7	7	83
4	4	4	4	0	0	0	0	0	2	7	7	7	3	3	3	7	4	3	10	10	10	10	10	12	0	9	15	10	4	50
3	0	0	0	0	0	0	0	0	1	8	7	5	0	0	2	8	2	3	10	10	10	10	10	0	0	10	6	10	3	29
5	1	2	0	0	0	0	1	0	4	7	6	7	4	6	4	7	3	8	9	10	10	7	8	3	1	10	25	11	5	55
6	3	1	1	0	0	2	0	0	6	5	5	5	6	0	5	10	3	0	10	10	10	10	10	5	2	15	15	15	6	58
5	2	3	5	0	3	2	2	1	1	5	5	6	1	1	1	7	1	1	10	10	10	10	7	10	8	14	5	8	5	50
5	2	0	1	0	0	1	3	1	5	8	7	6	5	5	4	9	4	7	9	10	9	10	10	3	5	9	26	13	5	61
6	7	5	9	0	2	6	2	0	8	3	5	8	0	5	6	7	7	6	10	10	10	10	10	21	10	14	26	13	6	90
5	2	1	0	0	2	0	0	2	6	2	1	0	10	6	8	2	4	6	7	10	10	10	8	3	4	27	32	10	5	81
3	1	0	1	0	0	0	0	0	1	9	7	7	1	0	2	10	3	2	10	10	10	10	10	2	0	7	7	12	3	31
4	3	2	1	0	0	0	0	0	2	7	6	5	3	2	1	8	4	4	10	10	10	10	10	6	0	12	15	9	4	46
5	4	0	0	0	0	0	8	0	2	5	7	5	0	2	4	8	5	3	10	10	10	10	10	4	8	13	12	12	5	54
7	5	8	5	5	5	7	5	0	0	3	8	4	0	0	3	5	4	3	9	9	9	9	10	23	17	15	7	8	7	77
3	0	5	0	0	0	0	0	0	3	10	7	9	0	7	0	10	0	1	10	10	10	10	10	5	0	4	11	10	3	33
3	3	8	8	3	2	3	3	3	5	5	8	7	2	2	5	9	5	4	10	10	10	10	10	22	11	10	18	14	3	78
4	0	5	5	0	3	1	0	3	6	3	4	7	5	5	10	10	3	6	10	10	10	10	10	10	7	16	25	20	4	82
7	0	5	0	2	4	0	0	5	7	5	5	5	8	6	6	5	3	5	10	10	10	10	10	7	9	15	29	11	7	78
6	6	8	5	0	4	0	0	0	9	5	7	7	2	3	10	10	5	3	10	10	10	10	10	19	4	11	22	20	6	82
4	5	10	9	10	0	5	3	3	7	4	5	7	6	9	0	5	5	5	10	10	10	10	10	34	11	14	32	5	4	100
3	3	0	0	0	0	0	0	0	0	3	7	7	5	7	0	10	0	0	10	10	10	10	10	3	0	13	12	10	3	41
6	7	10	8	10	5	4	8	0	3	5	5	5	1	1	0	10	0	4	10	10	10	10	10	35	17	15	9	10	6	92
4	4	5	5	0	1	0	0	0	0	8	8	7	0	0	2	9	0	3	10	10	10		10	14	1	7	3	11	4	40
6	4	4	4	2	2	2	2	0	3	4	8	7	0	0	2	10	2	2	10	10	10	10		14	6	11	7	12	6	56
0	0	2	1	0	0	0	0	0	0	8	9	9	0	0	0	10	0	0	10	10	10	10	10	3	0	4	0	10	0	17
1	0	1	0	0	0	0	0	0	0	10	9	9	0	0	0	10	2	4	10	10	10	10	10	1	0	2	6	10	1	20
2	0	2	0	0	0	0	0	0	0	8	7	6	0	0	3	8	3	3	10	10	10	10	10	2	0	9	6	11	2	30
2	0	7	2	0	0	0	0	0	0	10	8	8	0	0	0	10	2	3	10	10	10	10	10	9	0	4	5	10	2	30
3	0	2	2	0	0	0	0	0	2	7	7	6	1	1	0	8	4	4	10	10	10	10	10	4	0	10	12	8	3	37
2	1	0	0	0	0	0	0	0	9	10	8	7	8	10	5	5	8	9	7	10	9	8	7	1	0	5	44	10	2	62
7	8	7	8	2	6	6	7	0	5	6	5	5	2	4	6	8	5	8	8	8	8	8	9	25	19	14	24	14	7	103
5	2	4	5	3	3	0	0	2	3	4	5	5	0	0	0	10	0	2	10	10	10	10	10	14	5	16	5	10	5	55
4	1	0	0	0	0	0	0	0	0	9	7	9	0	0	1	9	0	2	9	10	9	10	10	1	0	5	2	10	4	22
7	5	8	9	6	3	1	0	2	4	4	4	5	4	2	4	5	0	5	10	10	10	10	10	28	6	17	15	9	7	82
5	5	0	5	0	0	3	0	0	3	5	7	5	5	4	0	7	3	3	10	10	10	9	10	10	3	13	18	7	5	56
5	3	2	7	0	0	0	0	0	4	6	6	6	2	2	7	8	7	4	10	10	10	10	10	12	0	12	19	15	5	63
8	9	8	10	0	10	9	10	0	10	0	3	2	7	1	0	5	2	10	10	10	10	10	10	27	29	25	30	5	8	124
2	3	4	2	0	8	5	1	4	3	4	8	5	3	3	2	8	8	4	7	10	9	7	10	9	18	13	21	10	2	73
3	1	4	5	0	0	3	2	1	3	8	7	7	0	0	3	9	2	3	10	10	10	10	10	10	6	8	8	12	3	47
3	0	0	2	0	0	0	0	0	0	8	8	10	1	3	1	10	1	2	10	10	10	10	10	2	0	4	7	11	3	27
4	0	0	0	0	0	0	0	0	0	10	6	10	0	0	0	10	0	2	10	10	7	10	10	0	0	4	2	10	4	20
4	7	7	8	6	3	3	3	0	2	6	4	4	5	4	0	10	5	4	10	10	10	10	10	28	9	16	20	10	4	87
7	1	5	2	0	1	2	0	2	10	5	3	3	4	10	6	7	9	5	9	9	9	9	5	8	5	19	38	13	7	90
4	4	2	2	1	1	1	1	2	3	4	3	4	1	0	1	6	6	1	9	9	9	10	10	9	5	19	11	7	4	55
0	0	0	0	0	0	0	0	0	0	4	6	7	2	2	6	5	6	6	10	10	10	10	10	0	0	13	16	11	0	40
8	10	9	10	10	5	5	0	5	10	1	5	3	9	9	10	4	10	10	10	10	10	10	10	39	15	21	48	14	8	145
2	3	0	2	2	1	1	0	0	0	3	4	4	0	2	0	10	5	2	10	10	10	10	10	7	2	19	9	10	2	49
1	0	0	0	0	0	0	0	0	0	8	9	9	0	0	0	10	0	0	10	10	10	10	10	0	0	4	0	10	1	15
9	3	8	0	0	7	7	0	4	5	6	7	8	8	9	6	7	0	6	10	10	10	10	10	11	18	9	28	13	9	88
2	2	0	4	0	0	0	0	0	3	7	4	4	6	2	6	10	2	1	10	10	9	10	10	6	0	15	14	16	2	53
7	10	10	10	10	10	9	9	8	9	0	4	10	8	7	8	3	8	8	10	10	10	10	10	40	36	16	40	11	7	150
3	0	4	1	0	4	1	1	2	4	5	6	7	1	2	1	8	9	7	9	10	8	10	10	5	8	12	23	9	3	60
6	7	10	10	5	8	8	7	7	3	3	5	4	3	3	5	2	2	7	10	10	10	5	8	32	30	18	18	7	6	111
3	3	0	2	0	0	0	0	0	0	7	6	7	2	2	0	10	2	1	10	10	10	10	10	5	0	10	7	10	3	35
4	7	5	4	0	0	3	0	2	5	5	5	4	2	1	2	10	7	4	10	10	10	10	10	16	5	16	19	12	4	72
2	2	6	1	0	4	4	7	3	0	6	7	7	0	0	5	5	7	5	9	10	10	10	9	9	18	10	12	10	2	61
7	7	5	2	5	5	4	2	3	8	1	0	0	10	8	9	4	8	10	10	10	10	10	10	19	14	29	44	13	7	126
8	7	0	3	0	0	0	0	0	6	5	5	8	2	1	0	10	0	5	10	10	10	10	10	10	0	12	14	10	8	54
5	5	8	9	10	0	2	0	2	2	5	3	7	2	0	7	10	5	5	10	10	10	10	10	32	4	15	14	17	5	87
5	4	5	4	1	0	0	0	0	2	5	5	6	0	0	2	5	0	0	10	10	10	10	10	14	0	14	2	7	5	42
7	10	10	10	8	8	8	6	10	8	0	8	2	9	8	10	7	3	10	8	10	10	5	10	38	32	20	38	17	7	152
6	4	3	7	5	0	0	0	0	3	5	4	5	0	0	3	6	2	2	10	10	10	10	10	19	0	16	7	9	6	57
2	3	0	0	0	0	1	0	0	4	8	9	7	2	5	8	7	2	4	9	10	10	2	10	3	1	6	17	15	2	44
3	2	1	3	2	1	0	0	1	1	8	2	2	1	1	1	9	2	1	10	10	10	7	10	8	2	18	6	10	3	47
7	6	6	10	7	0	3	4	3	5	3	7	6	8	0	7	5	0	4	10	10	10	10	10	29	10	14	17	12	7	89
5	5	10	10	10	5	5	7	3	10	2	4	0	7	3	10	0	10	10	10	10	10	10	10	35	20	24	40	10	5	134
5	6	7	7	0	0	0	0	8	3	5	7	5	4	6	8	10	5	6	10	10	10	10	10	20	8	13	24	18	5	88
1	0	8	0	0	0	0	0	0	1	7	6	5	0	2	3	8	4	3	10	10		10	10	8	0	12	10	11	1	42
4	8	9	9	5	8	10	5	10	10	0	0	0	5	8	10	0	5	8	10	10	10	10	10	31	33	30	36	10	4	144
6	6	6	5	0	0	0	0	0	7	6	5	5	4	4	10	8	3	5	10	10	10	10	10	17	0	14	23	18	6	78
1	1	2	2	0	0	0	0	0	0	6	7	7	0	0	1	9	0	1	10	10	10	10	10	5	0	10	1	10	1	27
2	2	0	1	0	0	1	0	0	0	6	5	4	1	5	0	9	6	4	9	10	9	2	10	3	1	15	16	9	2	46
3	0	0	0	0	0	0	0	0	1	5	8	8	0	0	0	8	2	4	10	10	9	10	8	0	0	9	7	8	3	27
5	7	4	8	1	1	0	0	1	0	2	1	1	8	7	0	3	10	10	10	10	10	10	10	20	2	26	35	3	5	91
7	8	8	9	9	4	7	5	4	9	8	7	5	5	5	9	3	5	6	9	9	9	9	9	34	20	10	30	12	7	113
7	5	7	0	4	0	0	0	0	0	7	7	7	0	0	0	10	1	0	10	10	10	10	10	16	0	9	1	10	7	43
3	5	2	6	2	8	0	0	0	0	4	9	7	0	0	0	10	2	0	10	10	10	10	10	15	8	10	2	10	3	48
5	5	0	7	0	0	0	0	0	2	5	6	6	3	3	0	10	0	0	10	10	10	10	10	12	0	13	8	10	5	48
5	3	5	4	0	2	2	0	0	3	3	6	6	3	2	6	6	5	4	8	8	8	9	9	12	4	15	17	12	5	65
6	4	7	4	0	3	2	2	2	5	3	5	7	4	5	4	3	4	4	10	10	10	10	10	15	9	15	22	7	6	74
6	3	4	3	0	2	2	0	5	7	4	4	3	6	7	0	9	8	8	9	9	10	5	6	10	9	19	36	9	6	89
3	2	6	1	0	0	0	0	0	1	8	7	7	1	3	3	7	2	3	10	9	10	10	10	9	0	8	10	10	3	40
6	5	2	5	0	0	0	0	0	5	5	5	6	3	4	6	7	5	4	8	9	10	9	7	12	0	14	21	13	6	66
5	1	5	2	0	0	0	0	0	2	7	9	7	6	5	10	10	8	2	10	10	10	10	10	8	0	7	23	20	5	63
3	3	4	5	0	0	4	1	2	3	5	6	6	6	8	1	5	2	7	10	10	10	10	10	12	7	13	26	6	3	67
2	2	2	3	0	2	2	0	0	1	6	8	7	2	2	7	8	2	3	9	10	10	10	10	7	4	9	10	15	2	47
6	10	7	10	7	2	0	0	0	4	3	5	5	3	4	8	3	4	6	10	10	10	10	10	34	2	17	21	11	6	91
3	1	2	6	0	0	0	0	0	1	8	8	5	2	5	1	8	10	5	10	10	10	10	10	9	0	9	23	9	3	53
1	0	0	0	0	0	0	0	0	1	8	9	9	1	0	0	9	0	1	10	10	10		10	0	0	4	3	9	1	17
4	0	2	0	0	0	0	0	0	0	4	4	5	5	2	1	8	7	5	10	10	10	10	10	2	0	17	19	9	4	51
9	10	8	10	10	8	8	9	9	7	1	1	0	5	0	9	1	8	1	10	10	10	10	10	38	34	28	21	10	9	140
4	4	3	3	0	0	0	0	0	5	4	6	7	0	2	5	8	8	8	10	10	10	10	10	10	0	13	23	13	4	63
7	3	3	0	0	0	0	0	0	5	6	6	4	0	0	5	5	0	2	7	10	10	10	10	6	0	14	7	10	7	44
6	0	0	0	0	0	0	0	0	0	2	2	1	2	3	8	2	1	0	8	8	7	5	5	0	0	25	6	10	6	47
6	3	10	6	0	2	2	0	1	5	5	5	5	1	2	3	4	4	7	10	10	10	10	10	19	5	15	19	7	6	71
6	0	3	0	0	0	2	0	0	3	7	5	5	1	5	7	9	2	5	10	10	10	10	10	3	2	13	16	16	6	56
7	7	7	8	1	2	4	0	0	7	4	4	3	5	1	5	5	3	5	10	10	10	10	10	23	6	19	21	10	7	86
3	0	4	1	0	0	0	0	0	2	8	8	8	2	3	6	5	2	2	8	9	9	9	9	5	0	6	11	11	3	36
3	2	3	2	0	0	0	0	0	0	4	5	5	6	6	5	7	6	6	9	9	9	9	9	7	0	16	24	12	3	62
5	3	2	3	0	0	0	0	0	4	9	9	8	5	5	5	8	4	5	9	9	9	9	9	8	0	4	23	13	5	53
3	2	2	3	0	1	1	1	1	1	7	5	5	6	6	3	10	1	3	10	10	10	10	10	7	4	13	17	13	3	57
4	4	7	9	0	5	0	0	0	2	3	3	4	0	7	0	10	4	3	8	10	10	10	10	20	5	20	16	10	4	75
6	5	1	4	0	0	0	0	0	4	7	6	6	0	3	6	10	3	6	10	10	10	10	10	10	0	11	16	16	6	59
8	3	4	0	0	0	0	0	0	6	7	4	5	5	5	7	7	5	7	10	10	10	10	10	7	0	14	28	14	8	71
6	6	6	4	8	2	2	2	2	3	5	5	6	1	4	3	8	1	5	9	9	9	9	9	24	8	14	14	11	6	77
4	5	2	6	1	0	3	7	0	1	5	4	3	0	0	2	5	2	0	10	10	10	10	10	14	10	18	3	7	4	56
7	7	7	9	10	4	4	4	4	7	7	6	6	6	6	7	8	8	8	10	10	10	10	10	33	16	11	35	15	7	117
7	5	5	5	7	3	0	0	2	3	5	6	7	2	0	3	7	6	5	10	10	10	10	10	22	5	12	16	10	7	72
6	10	7	10	8	0	1	0	0	5	4	5	7	6	8	3	9	8	8	10	10	10	10	10	35	1	14	35	12	6	103
3	1	4	1	0	0	0	0	0	1	5	4	6	5	2	0	6	5	6	10	10	10	10	10	6	0	15	19	6	3	49
5	1	4	4	0	0	0	0	1	2	7	7	7	1	1	4	10	6	4	10	10	10	10	10	9	1	9	14	14	5	52
5	0	0	5	0	0	0	0	0	3	5	5	3	0	0	7	10	3	5	10	10	10	10	10	5	0	17	11	17	5	55
2	0	1	0	10	0	0	0	0	0	7	7	6	0	2	6	8	5	2	10	10	9	10	10	11	0	10	9	14	2	46
3	3	5	0	0	4	5	0	3	2	7	6	6	4	2	3	8	4	7	10	10	10	10	10	8	12	11	19	11	3	64
6	0	0	0	0	0	0	0	0	3	7	7	6	1	3	2	10	4	3	9	10	9	10	10	0	0	10	14	12	6	42
3	3	5	1	0	0	0	0	0	3	4	5	6	0	0	10	7	5	5	7	2	5	8	2	9	0	15	13	17	3	57
7	6	3	2	2	2	10	10	0	10	5	6	7	2	6	2	10	7	8	10	10	10	8	10	13	22	12	33	12	7	99
8	6	3	4	6	0	0	0	0	4	2	6	3	0	2	10	8	5	7	6	9	8	9	10	19	0	19	18	18	8	82
2	0	0	0	0	0	0	0	0	0	8	7	7	0	2	5	9	3	3	10	10	10	8	10	0	0	8	8	14	2	32
7	8	10	10	10	10	10	9	10	9	1	1	1	7	7	8	2	9	8	9	9	9	9	10	38	39	27	40	10	7	161
6	7	4	7	0	5	5	0	0	8	3	2	6	2	9	8	2	7	10	7	8	8	9	5	18	10	19	36	10	6	99
5	5	10	5	0	10	1	3	2	5	4	4	8	0	3	3	10	3	3	10	10	10	10	10	20	16	14	14	13	5	82
3	0	0	2	0	0	0	0	0	0	5	3	5	6	1	3	5	6	4	10	10	10	10	10	2	0	17	17	8	3	47
8	10	8	8	10	1	5	0	2	6	6	2	2	0	0	9	2	6	10	10	10	10	1	10	36	8	20	22	11	8	105
3	10	6	10	10	10	6	3	2	2	1	3	2	0	1	1	1	0	9	10	10	10	10	10	36	21	24	12	2	3	98
6	7	3	10	0	3	0	3	0	10	0	5	3	8	10	10	5	10	10	10	10	10	10	10	20	6	22	48	15	6	117
4	10	10	10	10	0	3	0	2	10	1	3	5	5	5	10	5	7	10	10	10	10	10	10	40	5	21	37	15	4	122
6	8	10	10	10	3	0	0	0	3	5	6	8	0	0	7	8	5	5	10	10	10	10	10	38	3	11	13	15	6	86
7	5	8	5	0	7	6	5	6	8	5	4	5	7	5	9	6	8	7	10	10	10	9	10	18	24	16	35	15	7	115
9	0	0	0	0	0	0	0	0	3	7	5	7	7	8	3	8	5	7	10	10	10	10	10	0	0	11	30	11	9	61
6	7	10	10	10	10	8	5	4	10	2	0	5	5	8	7	5	10	10	5	9	9	10	10	37	27	23	43	12	6	148
10	10	10	10	10	8	10	10	7	7	2	1	1	9	9	0	3	10	8	10	10	10	10	10	40	35	26	43	3	10	157
6	10	10	10	0	8	8	5	5	9	1	5	4	6	5	5	5	7	6	2	5	4	8	6	30	26	20	33	10	6	125
7	2	0	10	0	2	2	0	0	7	4	5	5	0	2	3	8	1	6	10	10	10	10	10	12	4	16	16	11	7	66
3	4	4	4	0	0	0	0	0	0	7	6	4	4	4	2	7	7	7	9	10	10	10	10	12	0	13	22	9	3	59
5	0	8	0	0	0	0	0	0	6	8	5	5	6	5	8	4	5	6	9	9	9	9	9	8	0	12	28	12	5	65
3	0	0	3	0	0	0	0	0	5	7	6	5	8	4	7	8	0	6	10	10	10	10	10	3	0	12	23	15	3	56
4	4	6	4	0	0	0	0	1	0	5	4	3	0	0	5	5	3	4	10	10	10	10	10	14	1	18	7	10	4	54
0	0	0	0	0	0	0	0	0	0	0	0	0	0	0	0	0	0	0	0	0	0	0	0	0	0	30	0	0	0	30
